# 1 **Highly efficient homology-directed repair using transient CRISPR/Cpf1-geminiviral** 2 **replicon in tomato**

3 Tien Van Vu<sup>1,2</sup>, Velu Sivankalyani<sup>1</sup>, Eun-Jung Kim<sup>1</sup>, Mil Thi Tran<sup>1</sup>, Jihae Kim<sup>1</sup>, Yeon Woo  
4 Sung<sup>1</sup>, Duong Thi Hai Doan<sup>1</sup>, Jae-Yean Kim<sup>1,3,\*</sup>

5 <sup>1</sup>Division of Applied Life Science (BK21 Plus program), Plant Molecular Biology and Biotechnology  
6 Research Center, Gyeongsang National University, Jinju 660-701, Republic of Korea.

7 <sup>2</sup>National Key Laboratory for Plant Cell Biotechnology, Agricultural Genetics Institute, Km 02, Pham  
8 Van Dong road, Co Nhue 1, Bac Tu Liem, Ha Noi 11917, Viet Nam.

9 <sup>3</sup>Division of Life Science (CK1 program), Gyeongsang National University, 501 Jinju-daero, Jinju 52828,  
10 Republic of Korea.

11 \* **Correspondence: Jae-Yean Kim ([kimjy@gnu.ac.kr](mailto:kimjy@gnu.ac.kr))**

## 12 **ABSTRACT**

13 **Genome editing via homology-directed repair (HDR) pathway in somatic plant cells was**  
14 **very inefficient compared to illegitimate repair by non-homologous end joining (NHEJ).**  
15 **Here, compared to a Cas9-based replicon system, we enhanced approximately 3-fold in**  
16 **the HDR-based genome editing efficiency via transient geminiviral replicon system**  
17 **equipping with CRISPR/LbCpf1 in tomato and obtained replicon-free, but with stable**  
18 **HDR alleles. Efficiency of CRISPR/LbCpf1-based HDR was significantly modulated by**  
19 **physical culture conditions such as temperature or light. A ten-day incubation at 31 °C**  
20 **under light/dark cycles after *Agrobacterium*-mediated transformation performed the**  
21 **best among conditions tested. Further, we developed multi-replicon system which is a**  
22 **novel tool to introduce effector components required for the increase of HDR efficiency.**  
23 **Even if it is still challenging, we also showed a feasibility of HDR-based genome editing**  
24 **without genomic integration of antibiotic marker or any phenotypic selection. Our work**  
25 **may pave a way for transgene-free rewriting of alleles of interest in asexually as well as**  
26 **sexually reproducing plants.**

27 **Key words:** homology-directed repair (HDR), gene targeting, CRISPR/Cpf1, allele  
28 replacement, tomato.

29 **Running title:** Advancement of plant HDR by CRISPR/Cpf1

## 30 INTRODUCTION

31 *Streptococcus pyogenes* CRISPR-associated protein 9 (SpCas9) (Jinek et al., 2012) and  
32 *Lachnospiraceae bacterium* Cas12a (LbCas12a or LbCpf1) (Zetsche et al., 2015) have been  
33 widely used in genome engineering researches as the guide RNA-enzyme complexes to generate  
34 DNA double-stranded breaks (DSBs) in genome of various kingdoms including plantae (Hsu et  
35 al., 2014; Barrangou and Doudna, 2016). In plant somatic cells, DSBs are efficiently repaired by  
36 a non-homologous end joining (NHEJ) mechanism, which dominates over the homology-directed  
37 repair (HDR) pathway (Puchta, 1998; Jiang et al., 2012). NHEJ repair usually leads to different  
38 types of mutations including DNA sequence insertion, deletion (Hsu et al., 2014; Zetsche et al.,  
39 2015), chromosome rearrangement, or chromosome relocation (Richardson et al., 1998;  
40 Ferguson and Alt, 2001; Varga and Aplan, 2005 and our own observations in tomato). To our  
41 knowledge, HDR is the major way to precisely edit a gene of interest regardless the mutation  
42 types, lengths, and locations of DNA sequences. However, application of HDR in plant has been  
43 very limited due to its extremely low efficiency (Puchta, 1998). Therefore, there is a practical  
44 demand to develop an efficient HDR-based genome editing system for crop breeding.

45 Previously, geminiviral replicons combined with the Cas9 or TALEN were successfully used to  
46 increase HDR efficiency in tomato (Čermák et al., 2015) but the efficiency might not be high  
47 enough for practical applications in crop plant improvement (Hummel et al., 2018). It was  
48 suggested that Cpf1 might have an advantage in HDR-based genome editing compared to  
49 Cas9, because the cutting site of Cpf1 is located distal to the core target sequence and the  
50 protospacer adjacent motif (PAM), allowing recutting even after indel mutations introduced  
51 during NHEJ-mediated repair (Baltes et al., 2014). We hypothesized that combination of a  
52 CRISPR/Cpf1 complex and a *de novo* engineered geminiviral replicon could be able to  
53 overcome the barrier in plant HDR.

54 Here, we report an efficient homology-directed repair using transient CRISPR/LbCpf1-  
55 geminiviral replicon in tomato. Through this work we aimed to level up HDR efficiency for  
56 practical applications in crop plant breeding.

## 57 **RESULTS AND DISCUSSION**

### 58 **CRISPR/LbCpf1-based geminiviral replicon system highly enhanced HDR in tomato**

59 To test the hypothesis, we re-engineered a *Bean Yellow Dwarf Virus (BeYDV)* replicon to  
60 supply high doses of homologous donor templates, and used a CRISPR/LbCpf1 system  
61 (Zetsche et al., 2015) for DSB formation (Figure 1A and 1B). Selection of HDR events was  
62 supported by a double selection/screening system using kanamycin resistance and  
63 anthocyanin overproduction (Figure 1A).

64 To validate our system, the LbCpf1 expression cassette driven by a CaMV 35S promoter and  
65 5'UTR with AtUBI10 intron I, guide RNA scaffolds and donor templates were cloned into the  
66 *de novo* engineered geminiviral DNA amplicon (Figure 1B) and transformed via *Agrobacteria*  
67 into tomato cotyledon explants. The *de novo* engineered geminiviral DNA amplicon system  
68 exhibited efficient and durable maintenance of circularized DNAs in tomato leaves  
69 (Supplemental Figure 1). The LbCpf1 system using two guide RNAs for targeting the ANT1  
70 gene, a key transcription factor controlling anthocyanin pathway, showed the much higher  
71 HDR efficiency, at  $4.51 \pm 0.63$  %, visible as purple calli and/or shoots (Figure 1C and 1D),  
72 compared to the other control constructs including a “minus Rep” (pRep<sup>-</sup>), “minus gRNA”  
73 (pgRNA<sup>-</sup>), and comparable to a CRISPR/SpCas9-based construct (pTC217). The data  
74 revealed that functional geminiviral replicons were crucial for the enhancement of HDR  
75 efficiencies (Figure 1C) as shown in other works (Čermák et al., 2015). This is the first report  
76 showing highly efficient HDR in plants using Cas12a expressing from a geminiviral replicon.

### 77 **Light conditions or photoperiods enhanced HDR efficiency of CRISPR/LbCpf1 system**

78 Boyko and coworkers (2005) showed the strong impact of short-day conditions on  
79 intrachromosomal recombination repair (ICR) in *Arabidopsis*. We tested if the same could be  
80 true in tomato somatic cells. Using various lighting regimes, including complete darkness  
81 (DD), short (8-h light/16-h dark; 8L/16D) and long (16L/8D) day conditions, we found that  
82 HDR efficiencies achieved under short and long day conditions were higher than those in the  
83 DD condition in the case of LbCpf1, but not SpCas9, and reached up to  $6.62 \pm 1.29$  % ( $p < 0.05$ ,  
84 Figure 1E). The advancement of LbCpf1-based HDR system might be explained by stress-

85 responses of the host cells which rushed for maintenance of genome stability (Boyko et al.,  
86 2005) by any means of DNA repairs including HDR.

### 87 **CRISPR/LbCpf1-based HDR was significantly higher compared to CRISPR/Cas9-based** 88 **system at high temperature**

89 Temperature is an important factor controlling ICR (Boyko et al., 2005) and CRISPR/Cas9-  
90 based targeted mutagenesis in plants (LeBlanc et al., 2018) and CRISPR/Cpf1-based HDR  
91 through controlling genome accessibility in zebrafish and *Xenopus* (Moreno-Mateo et al.,  
92 2017) were also reported. Pursuing the approach for improvement of HDR, we compared  
93 HDR efficiencies of pHR01 and pTC217 systems at various temperature treatments, since the  
94 two nucleases, SpCas9 and LbCpf1 may respond differently. Our data revealed that within the  
95 temperature range of 19-31°C, somatic HDR increased with increasing temperature (Figure  
96 1F). Notably, at 31°C, LbCpf1 showed more than 2-fold higher HDR efficiency compared to  
97 SpCas9 ( $p < 0.05$ ). The results supported the principle of stress-stimulated HDR in plants  
98 reported by Boyko and coworkers (2005). The ease of genome accessibility at high  
99 temperatures of LbCpf1 (Moreno-Mateos et al., 2017) in combination with the ability to  
100 repeatedly cut at the target sites (Zetche et al., 2015) may explained higher HDR efficiencies  
101 of LbCpf1 compared to that of SpCas9. For the first time comparison data of plant HDR  
102 between Cas9 and Cpf1-based systems are shown, offering an alternatively better system for  
103 plant HDR improvement.

### 104 **A multiple replicon system performed better for HDR than the single one**

105 To compete with the efficient NHEJ pathway, protein involving in the HDR pathway were  
106 over-expressed, activated or enhanced leading to significant higher efficiencies (Ye et al.,  
107 2018; Pawelczak et al., 2018). For further improvement of our system, we used several  
108 molecular approaches for HDR improvement in tomato. The first was to activate nine HDR  
109 pathway genes (Supplemental Table 1) using the dCas9-sun tag/scFv-VP64 activation system  
110 (Tanenbaum et al., 2014). A single construct system (pHR01-Activ, Supplemental Figure 2A)  
111 showed negative effects on HDR (data not shown), which may be due to its large size (~32 kb  
112 as T-DNA and ~27 kb as circularized replicon).

113 The size of viral replicons is inversely correlated with their copy numbers (Suarez-Lopez and  
114 Gutierrez, 1997; Baltes et al., 2014). In this work we also tested a novel idea to use a T-DNA  
115 producing multiple replicons (pHR01-MR, Figure 2A, and Supplemental Figure 2B).  
116 Compared to pHR01, the construct showed HDR efficiencies with 39% increase. We also  
117 confirmed the release of three replicons from a single vector (pHR01-MR) used in this work  
118 (Figure 2B). To our best knowledge, this is the first report that multiple replicons can be used  
119 for efficient genome editing via HDR pathway. This multiple replicon system may also  
120 provide more flexible choices for expressing multiple genes/genetic tools/DNA agents with  
121 high copies in plant cells.

### 122 **The true HDR events were obtained at high frequency**

123 To verify the HDR repair events in the study, PCR analyses were conducted using primers  
124 specific for the right (UPANT1-F1/NptII-R1) and left (ZY010F/TC140R) (Figure 1A;  
125 Supplemental Table 2 and 3) junctions, using genomic DNAs extracted from derived HDR  
126 events (independently regenerated purple plants or Genome Edited generation 0 (GE0)) (Fig  
127 2C, Supplemental Figure 3). For pHR01, all (16/16) of the independent events the expected  
128 band for right junction integration and 10/16 independent events showed the expected band  
129 for left junction repair (Figure 2B). More importantly, 15 out 16 events showed no  
130 amplification of circularized forms (Supplemental Figure 4) of the DNA replicon, and even  
131 the replicon-carrying event lost it after long-term growth in greenhouse conditions (data not  
132 shown), indicating those plants were free of replicon (Figure 2D). The loss of replicon might  
133 be explained by a reversed construction of the donor template (Figure 1B) leading to opposite  
134 arrangement of LIR forward promoter sequence against a 35S promoter sequence (LIR-p35S  
135 orientation interference) and thus triggering silencing mechanism in the plant cells in later  
136 stage, especially when antibiotic selection pressure was absent. This explanation was later  
137 confirmed by the appearance of replicons in majority of plants regenerated using other  
138 replicon systems absented the LIR-p35S orientation interference. The PCR products were  
139 sequenced to identify junction sequences. A majority of the events (11/16) showed sequences  
140 corresponding to perfect right arm integration by HDR repair, 5/16 events showed a  
141 combination of HDR and NHEJ repair with NHEJ fingerprint at the 5' terminal of pNOS  
142 sequence (Supplemental Figure 5A), highlighted in blue in the event C1.8). All of the

143 sequences amplified from left junctions showed perfected DNA sequence exchange by HDR  
144 pathway ([Supplemental Figure 5B](#)).

### 145 **The HDR allele was stably inherited in offspring by self-pollination as well as backcrossing**

146 To confirm stable heritable edits, we grew Genome Edited generation 1 (GE1) plants ([Figure](#)  
147 [2E](#)) obtained from self-pollination of LbCpf1-based HDR GE0 events, and found segregating  
148 population in purple phenotype ([Supplemental Table 4](#)) similar to data shown by Čermák and  
149 coworkers ([2015](#)). PCR analyses of the segregated plants showed inheritance of the edited  
150 allele ([Figure 2F](#) and [Supplemental Figure 6](#)). Offspring segregated from the #C1.4 event  
151 were analyzed in detail. Five dark-purple plants (C1.4.1-C1.4.5, were homozygous for the  
152 ANT1 HDR edited allele, [Supplemental Figure 7](#)), six pale purple plants (C1.4.30-C1.4.35,  
153 were heterozygous for the ANT1 HDR edited allele, [Supplemental Figure 7](#)), and two wild-  
154 type like plants did not contain the HDR edited allele, as expected ([Figure 2F](#), predicted  
155 results correlating to their phenotypes). Dark-purple plants showed the PCR amplification  
156 from the replaced allele, but no amplification of wild-type allele when PCRs were performed  
157 using primers flanking outside the editing site ([Figure 1A](#)). In contrast, heterozygous and  
158 wild-type plants showed a band corresponding to the wild-type allele. Further assessment  
159 indicated that the GE2 offspring of the homozygous GE1 were all dark purple and their back-  
160 crossed (to WT female as pollen acceptors) BC1F1 generation showed all pale purple  
161 phenotype ([Supplemental Figure 7](#)). Sanger sequencing revealed perfect inheritance of the  
162 HDR edited allele from GE0 generation of event C1.4 ([Supplemental Figure 8](#)) to its  
163 homozygous offspring. These data also showed no amplification of circular forms of the DNA  
164 replicon ([Figure 2F](#) and [Supplemental Figure 6](#)) indicating that GE1 plants were also free of  
165 the replicons. By contrast, Several GE1 plants obtained from the pTC217 showed  
166 amplification of circularized replicons ([Supplemental Figure 5B](#), data not shown). It is worthy  
167 note that the pTC217 vector arrangement ([Figure 1B](#)) is in the absence of the LIR-p35S  
168 orientation interference.

### 169 **Practically successful editing by HDR of a HKT1;2 allele**

170 To show the applicability of our HDR system in practical plant genome editing we sought to  
171 use it to edit a potentially agronomical trait and thus salinity tolerance was chosen. The High-  
172 affinity K<sup>+</sup> Transporter 1;2 (*HKT1;2*) plays important role in the maintenance of K<sup>+</sup> uptake  
173 under salt stress (Ali et al., 2012). The salinity tolerance was shown to be determined by a  
174 single N/D variance (N217D in tomato) in the pore region of *HKT1;2*, which determines the  
175 selectivity for Na<sup>+</sup> and K<sup>+</sup> (Ali et al., 2016). We succeeded to have a perfect HDR GE0 event  
176 to produce the salt tolerant allele (N217D) (Ali et al., 2016) (Figure 3A, Supplemental Table 5)  
177 using our system with a *HKT1;2* gene donor template which contains neither antibiotic  
178 selection marker nor ANT1 color marker (Figure 3B). The CRISPR/LbCpf1 system was very  
179 effective for NHEJ repair as it generated up to 72% indel mutation rates (Supplemental Figure  
180 9). The edited event with the D217 allele shows normal morphology compared to WT (Figure  
181 3C). It should be noted that the mutated nucleotide (A to G) of *HKT1;2* is not accessible by  
182 any currently known base editor (BE) including xCas9-ABE (Hu et al., 2018), underlining the  
183 significance of HDR-based genome editing.

184 Taken together, through applications of various approaches, our study showed a high  
185 improvement of HDR efficiency in tomato somatic cells. The HDR allele exhibited similar  
186 inheritance to natural allele as it was transferred to next generation following Mendelian rules.  
187 The advancement of HDR in somatic cells and obtaining replicon-free HDR-edited plants in  
188 GE0 generation will open a door for practical applications of the technique to genetically  
189 improve crop traits, with special interest in asexually reproducing crops.

## 190 MATERIAL AND METHODS

### 191 Construction and cloning of HDR testing systems

192 The entire design principle and cloning works followed MoClo (Weber et al., 2011) and  
193 Golden Gate (Engler et al., 2014) protocols. The pLSL.R.Ly was designed by amplifying the  
194 long intergenic region (LIR), short intergenic region (SIR) and lycopene marker from pLSLR  
195 plasmid (Čermák et al., 2015) and cloned following the order shown in the Supplemental  
196 Figure 1A. Level 2 Golden Gate BpiI restriction sites flanking the pink marker gene (lycopene)  
197 were also integrated inside the replicon for cloning of HDR expression cassettes. The release  
198 of circularized DNA replicons was validated in tomato leaves (Supplemental Figure 1B) as

199 well as tomato cotyledon explants (data not shown). pTC147 and pTC217 plasmids (Čermák  
200 et al., 2015) were obtained from Addgene and was used as a reference. The LbCpf1-based  
201 HDR replicons were similarly designed and cloned (as the SpCas9-based constructs) with two  
202 guide RNAs (LbCpf1\_gRNA1 and LbCpf1\_gRNA2, Figure 1A). Donor DNAs were  
203 constructed for integration of an antibiotic selection marker (NptII) and insertion of a CaMV  
204 35S promoter for driving over-expression of ANT1 gene (Figure 1A). The dual guide RNA  
205 construct was designed by multiplexing the LbCpf1 crRNAs as a tandem repeat of scaffold  
206 RNA followed by 23nt guide RNA sequences. The crRNAs were driven by an AtU6 promoter  
207 (Kamoun Lab, Addgene #46968) and terminated by a 7-T chain sequences.

## 208 **Tomato transformation**

209 Our research study on HDR improvement was conducted using tomato (Hongkwang cultivar,  
210 a local variety) as a model plant. All the binary vectors were transformed into *Agrobacterium*  
211 *tumefaciens* GV3101 (pMP90) using electroporation. *Agrobacterium*-mediated transformation  
212 was used to deliver editing tools into tomato cotyledon fragments (Supplemental Figure 10).  
213 Explants for transformation were prepared from 7-day-old cotyledons. Sterilized seeds of the  
214 Hongkwang cultivar were grown in MSO medium (half-strength MS medium containing 30  
215 g/L of sucrose, pH 5.8) at 25±2°C under 16 h/8 h light/dark conditions. Seven-day-old  
216 seedlings were collected, and their cotyledonary leaves were sliced into 0.2-0.3 cm fragments.  
217 The fragments (explants) were pre-treated on PREMC medium [MS basal salts, Gamborg B5  
218 vitamins, 2.0 mg/L of Zeatin trans-isomer and 0.2 mg/L of indolyl acetic acid (IAA), 1 mM of  
219 putrescine and 30 g/L of glucose, pH 5.7] for 1 day. The pre-cultured explants were then  
220 pricked and transformed using *A. tumefaciens* GV3101::pMP90 cells carrying HR construct(s).

221 *A. tumefaciens* GV3101::pMP90 cells were grown in primary culture overnight (LB  
222 containing suitable antibiotics) in a shaking incubator at 30°C. *Agrobacteria* were then  
223 collected from the culture (OD 0.6-0.8) by centrifugation. The cells were re-suspended in  
224 liquid ABM-MS (pH 5.2) and acetosyringone 200 µM. Transformation was carried out for 25  
225 min at RT. The explants were then transferred to co-cultivation medium containing all of the  
226 components in the ABM-MS medium and acetosyringone 200 µM, pH 5.8. The co-cultivation  
227 plates were kept in the darkness at 25°C for 2 days, and the explants were shifted to non-  
228 selection medium (NSEL) for 5 days and then sub-cultured to selection medium (SEL5). The



229 non-selection and selection media contained all of the components in the pre-culture medium,  
230 as well as 300 mg/L of timentin and 80 mg/L of kanamycin. Sub-culture of the explants was  
231 carried out at 14-day-interval to achieve the best regeneration efficiency. Explants containing  
232 purple calli or shoots were then transfer onto SEL5R medium (similar to SEL5 but reduced  
233 zeatin trans-isomer to 1.0 mg/L) for further regeneration and/or elongation. When the shoots  
234 were sufficiently long (1.5-3.0 cm), they were transferred to rooting medium (containing all  
235 of the components in the elongation medium except zeatin trans-isomer and plus 1.0 mg/L  
236 IBA) to generate intact plants. The intact plants from the rooting medium were transferred to  
237 vermiculite pots to allow them to harden before shifting them to soil pots in a greenhouse with  
238 a temperature of  $26\pm 2^{\circ}\text{C}$  and under a 16 h/8 h photoperiod. Experimental treatment of  
239 physical conditions and data collection were conducted as described in [Supplemental Figure](#)  
240 [10](#).

#### 241 **HDR event evaluation**

242 Assessment of gene targeting junctions was performed by conventional PCR using primers  
243 flanking left (UPANT1-F1/NptII-R1) and right (ZY010F/TC140R ([Cermak et al., 2015](#))  
244 [Supplemental Table 2](#) and [3](#)) junctions and a high fidelity taq DNA polymerase (Phusion taq,  
245 Thermo Fisher Scientific, USA) and Sanger sequencing (Solgent, Korea). DNA amplicons  
246 were evaluated by semi-quantitative PCRs and qPCRs (using KAPA SYBR FAST qPCR Kits,  
247 Sigma-Aldrich, USA). Analyses of inherited behaviors of HDR edited allele were performed  
248 with genome edited generation 1 (GE1) by PCRs and Sanger sequencing. Circularized  
249 replicons were detected using PCR with the respected primers for either pHR01  
250 ([Supplemental Table 2](#)) or pTC217 ([Supplemental Table 3](#)).

#### 251 **Statistical analyses**

252 HDR efficiencies were recorded in at least three replicates and statistically analyzed and plotted  
253 using PRISM 7.01 software. In [Figure 1C](#), multiple comparisons of the HDR efficiencies of the  
254 other constructs with that of pRep<sup>-</sup> were done by one-way ANOVA analysis (Uncorrected  
255 Fisher LSD test, n=3, df=2, t=4.4; 4.4 and 1.5 for pTC217; pHR01 and p $\text{gRNA}^{-}$ , respectively).  
256 In [Figure 1E](#), pairwise comparisons of the HDR efficiencies of pTC217 and pHR01 in the  
257 three lighting conditions were done by Student t-test (DD: t=1.222, df=4; 8L/16D: t=2.424,

258 df=7 and 16L/8D:  $t=3.059$ ,  $df=4$ ). In [Figure 1F](#), comparisons of the HDR efficiencies of  
259 pTC217 and pHR01 in the various temperature conditions were done by Student t-test (19°C:  
260  $t=2.656$ ,  $df=2$ ; 25°C:  $t=3.346$ ,  $df=2$ ; 28°C:  $t=2.099$ ,  $df=5$ ; 31°C:  $t=4.551$ ,  $df=2$ ).

## 261 **FUNDING**

262 This work was supported by the National Research Foundation of Korea (Grant NRF  
263 2017R1A4A1015515) and by the Next-Generation BioGreen 21 Program (SSAC, Grant  
264 PJ01322601), Rural Development Administration (RDA), Republic of Korea.

## 265 **AUTHOR CONTRIBUTIONS**

266 T.V.V., V.S. and J.Y.K. designed the experiments; T.V.V., V.S., E, J. K., M.T.T., J.K.,  
267 Y.W.S., and D.T.H.D performed the experiments; T.V.V. and J.Y.K. analyzed the results;  
268 T.V.V. and J.Y.K. wrote the manuscript.

## 269 **COMPETING INTERESTS**

270 The authors have submitted a Korean patent application (application no. 10-2018-0007579)  
271 based on the results reported in this paper.

## 272 **ACKNOWLEDGMENTS**

273 We thank MinWoo Park for providing Hongkwang tomato seeds.

## 274 **REFERENCES**

- 275 Ali, A., Raddatz, N., Aman, R., Kim, S., Park, H.C., Jan, M., Baek, D., Khan, I.U., Oh, D.H.,  
276 Lee, S.Y., et al. (2016) A Single Amino-Acid Substitution in the Sodium Transporter  
277 HKT1 Associated with Plant Salt Tolerance. *Plant Physiol.* 171(3):2112-2126.
- 278 Ali, Z., Park, H.C., Ali, A., Oh, D.H., Aman, R., Kropornicka, A., Hong, H., Choi, W., Chung,  
279 W.S., Kim, W.Y., et al. (2012). TsHKT1;2, a HKT1 homolog from the extremophile  
280 Arabidopsis relative *Thellungiella salsuginea*, shows K(+) specificity in the presence of  
281 NaCl. *Plant Physiol.* 158(3):1463-1474.
- 282 Baltes, N.J., Gil-Humanes, J., Cermak, T., Atkins, P.A. and Voytas, D.F. (2014). DNA replicons  
283 for plant genome engineering. *Plant Cell.* 26(1):151-163.

- 284 Barrangou, R. and Doudna, J.A. (2016). Applications of CRISPR technologies in research and  
285 beyond. *Nat Biotechnol.* 34(9):933-941.
- 286 Boyko, A., Filkowski, J. and Kovalchuk, I. (2005). Homologous recombination in plants is  
287 temperature and day-length dependent. *Mutat Res.* 572(1-2):73-83.
- 288 Čermák, T., Baltes, N.J., Čegan, R., Zhang, Y. and Voytas, D.F. (2015). High-frequency, precise  
289 modification of the tomato genome. *Genome Biol.* 16:232.
- 290 Engler, C., Youles, M., Gruetzner, R., Ehnert, T.M., Werner, S., Jones, J.D., Patron, N.J. and  
291 Marillonnet, S. (2014). A golden gate modular cloning toolbox for plants. *ACS Synth Biol.*  
292 3(11):839-843.
- 293 Ferguson, D.O. and Alt, F.W. (2001). DNA double strand break repair and chromosomal  
294 translocation: lessons from animal models. *Oncogene.* 20(40):5572-5579.
- 295 Hsu, P.D., Lander, E.S., and Zhang, F. (2014). Development and applications of CRISPR-Cas9  
296 for genome engineering. *Cell.* 157(6):1262-1278.
- 297 Hu, J.H., Miller, S.M., Geurts, M.H., Tang, W., Chen, L., Sun, N., Zeina, C.M., Gao, X., Rees,  
298 H.A., Lin, Z. and Liu, D.R. (2018). Evolved Cas9 variants with broad PAM compatibility  
299 and high DNA specificity. *Nature.* 556(7699):57-63.
- 300 Hummel, A.W., Chauhan, R.D., Cermak, T., Mutka, A.M., Vijayaraghavan, A., Boyher, A.,  
301 Starker, C.G., Bart, R., Voytas, D.F. and Taylor, N.J. (2018). Allele exchange at the EPSPS  
302 locus confers glyphosate tolerance in cassava. *Plant Biotechnol J.* 16(7):1275-1282.
- 303 Jiang, W., Zhou, H., Bi, H., Fromm, M., Yang, B. and Weeks, D.P. (2013). Demonstration of  
304 CRISPR/Cas9/sgRNA-mediated targeted gene modification in Arabidopsis, tobacco,  
305 sorghum and rice. *Nucleic Acids Res.* 41(20):e188.
- 306 Jinek, M., Chylinski, K., Fonfara, I., Hauer, M., Doudna, J.A., and Charpentier, E. (2012). A  
307 programmable dual-RNA-guided DNA endonuclease in adaptive bacterial immunity. *Science.*  
308 337(6096):816-821.

- 309 LeBlanc, C., Zhang, F., Mendez, J., Lozano, Y., Chatpar, K., Irish, V.F. and Jacob, Y. (2018).  
310 Increased efficiency of targeted mutagenesis by CRISPR/Cas9 in plants using heat stress.  
311 *Plant J.* 93(2):377-386.
- 312 Moreno-Mateos, M.A., Fernandez, J.P., Rouet, R., Vejnar, C.E., Lane, M.A., Mis, E., Khokha,  
313 M.K., Doudna, J.A. and Giraldez, A.J. (2017). CRISPR-Cpf1 mediates efficient  
314 homology-directed repair and temperature-controlled genome editing. *Nat Commun.*  
315 8(1):2024.
- 316 Pawelczak, K.S., Gavande, N.S., VanderVere-Carozza, P.S., Turchi, J.J. (2018). Modulating  
317 DNA Repair Pathways to Improve Precision Genome Engineering. *ACS Chem Biol.*  
318 13(2):389-396.
- 319 Puchta, H. (1998). Repair of genomic double-strand breaks in somatic plant cells by one-sided  
320 invasion of homologous sequences. *The Plant Journal* 13(3):331–339.
- 321 Richardson, C., Moynahan, M.E. and Jasin, M. (1998). Double-strand break repair by  
322 interchromosomal recombination: suppression of chromosomal translocations. *Genes Dev.*  
323 12(24):3831-3842.
- 324 Suárez-López, P. and Gutiérrez, C. (1997). DNA replication of wheat dwarf geminivirus vectors:  
325 effects of origin structure and size. *Virology.* 227(2):389-399.
- 326 Tanenbaum, M.E., Gilbert, L.A., Qi, L.S., Weissman, J.S. and Vale, R.D. (2014). A protein-  
327 tagging system for signal amplification in gene expression and fluorescence imaging. *Cell.*  
328 159(3):635-646.
- 329 Varga, T. and Aplan, P.D. (2005). Chromosomal aberrations induced by double strand DNA  
330 breaks. *DNA Repair (Amst).* 4(9):1038-1046.
- 331 Weber, E., Engler, C., Gruetzner, R., Werner, S. and Marillonnet, S. (2011). A modular cloning  
332 system for standardized assembly of multigene constructs. *PLoS One.* 6(2):e16765.
- 333 Ye, L., Wang, C., Hong, L., Sun, N., Chen, D., Chen, S., Han, F. (2018). Programmable DNA  
334 repair with CRISPR*/i* enhanced homology-directed repair efficiency with a single Cas9.  
335 *Cell Discov.* 4:46.

336 Zetsche, B., Gootenberg, J.S., Abudayyeh, O.O., Slaymaker, I.M., Makarova, K.S.,  
337 Essletzbichler, P., Volz, S.E., Joung, J., van der Oost, J., Regev, A., et al. (2015). Cpf1 is a  
338 single RNA-guided endonuclease of a class 2 CRISPR-Cas system. *Cell*. 163(3):759-771.

## 339 **FIGURE LEGENDS**

### 340 **Figure 1. HDR-based genome editing of ANT1 locus.**

341 (A) Representatives of ANT1 targeting sites and homologous DNA donor template  
342 construction. The upstream sequence of ANT1 locus (middle panel) was selected for targeting  
343 by HDR. Two guide RNAs were used (depicted by two vertical arrows on the middle panel  
344 and sequence details in bottom panel). Kanamycin expression cassette (pNOS-NptII-tOCS)  
345 and CaMV 35S promoter was designed to be inserted at a position 142 bp upstream of ANT1  
346 start codon.

347 (B) T-DNA constructs used for HDR improvement experiments. The dual guide RNA scaffold  
348 ( $2 \times 1gRNA^{ANT1}$ ) was driven by Arabidopsis U6 promoter core element (75bp). LbCpf1  
349 expression cassette was re-engineered to contain Arabidopsis Ubiquitin 1 intron I downstream  
350 of CaMV 35S promoter and upstream of LbCpf1 and to be terminated by CaMV 35S  
351 terminator (35S-LbCpf1I-t35S). Red and orange boxes show long intergenic region and short  
352 intergenic region of geminivirus DNA.

353 (C) HDR efficiency comparison among different constructs.

354 (D) Representative photograph of HDR edited T0 events indicating as purple calli (red arrows)  
355 or direct HDR shoot formation (purple arrow).

356 (E) Impact of photoperiod on HDR. Tomato cotyledon fragments transformed were incubated  
357 under different lighting regimes for the first 10 days post-washing. DD: continuous darkness;  
358 8L/16D: 8 hours-lighting/16 hours-darkness; 16L/8D: 16 hours-lighting/8 hours-dark.

359 (F) HDR efficiencies of pTC217 and pHR01 construct obtained in various temperatures. HDR  
360 efficiencies were recorded in at least triplicates, calculated and plotted using PRISM 7.01  
361 software (details of statistical analyses are described in Methods section). \*: significantly  
362 different ( $p < 0.05$ ); ns: not significantly different; p values are showing on the top of the bars  
363 of (F) for comparisons.

364 Data in (B), (E) and (F) are represented as mean  $\pm$  SEM.

365

366 **Figure 2. Novel approaches for HDR improvement and analyses of the HDR edited**  
367 **plants.**

368 (A) Multi-replicon construct tested for improvement of HDR over NHEJ. Red and orange  
369 boxes show long intergenic region and short intergenic region of geminivirus DNA.

370 (B) PCR detection of circularized replicons simultaneously released from multiple replicon  
371 vector (pHR01-MR). 0d, 3d, 6d and 9d: samples collected at 0, 3, 6 and 9 days post  
372 transformation with *Agrobacterium* carrying pHR01-MR.

373 (C) Representative HDR edited plant in greenhouse conditions and their fruits.

374 (D) PCR analysis data of some representative HDR independent events.

375 (E) Generation 1 of the HDR edited events (GE1). GE1 plant (left) germinated in soil pot in  
376 comparison with wild-type plant (right).

377 (F) PCR analysis data of some GE1 offspring of C1.4 event. P: pHR01 plasmid isolated from  
378 *Agrobacteria*; L: 1kb ladder; N: water control; WT: wild-type tomato Hongkwang; C1.1, C1.2,  
379 C1.3, C1.8: Independent LbCpf1-based HDR GE0 events; C1.4.1, C1.4.2, C1.4.3, C1.4.4 and  
380 C1.4.5: GE1 plants, showing dark purple color, obtained from self-pollination of the event  
381 C1.4.

382

383 **Figure 3. HKT1;2 N217D allele editing by HDR using the CRIPSR/Cpf1-based replicon**  
384 **system.**

385 (A) Sanger sequencing of the event #C156 showing perfectly edited HKT1;2 N217 to D217  
386 allele with WT allele as a reference. The nucleotides highlighted in the discontinuous red boxes  
387 denote intended modifications for N217D; PAM and core sequences (to avoid re-cutting).

388 (B) HDR construct layout for HKT1;2 editing. There is neither selection nor visible marker  
389 integrated into the donor sequence. The *NptII* marker was used for enrichment of transformed  
390 cells.

391 (C) Morphology of the HKT1;2 N217D edited event compared to its parental WT in greenhouse  
392 conditions.

393 **LIST OF SUPPLEMENTAL TABLES**

394 [Supplemental Table 1](#). Targeted genes and guide RNAs used in HDR activation experiment.

395 [Supplemental Table 2](#). Primers for LbCpf1-based HR event analyses

396 [Supplemental Table 3](#). Primers for SpCas9-based HR event analyses

397 [Supplemental Table 4](#). Phenotypic segregation of self-pollinated offspring of the LbCpf1-based  
398 HDR events

399 [Supplemental Table 5](#). Summary of *SIHKT1;2* HDR experiment

## 400 **LIST OF SUPPLEMENTAL FIGURES**

401 **Supplemental Figure 1. The *de novo* engineered geminiviral amplicon (named as**  
402 **pLSL.R.Ly) and its replication in tomato.**

403 (A) Map of pLSL.R.Ly. The DNA amplicon is defined by its boundary sequences (Long  
404 Intergenic Region, LIR) and a terminated sequence (Short Intergenic Region, SIR). The  
405 replication associated protein (Rep/RepA) is expressed from the LIR promoter sequence. All of  
406 the expression cassettes of HDR tools were cloned into the vector by replacing the red marker  
407 (Lycopene) using a pair of type IIS restriction enzyme (BpiI, flanking ends are TGCC and  
408 GGGA). Left (LB) and right (RB) denote the borders of a T-DNA.

409 (B) Circularized DNA detection in tomato leaves infiltrated with pLSL.R.Ly compared to that of  
410 pLSLR. Agrobacteria containing the plasmids were infiltrated into tomato leaves (Hongkwang  
411 cultivar) and infiltrated leaf were collected at 6, 8 and 11 dpi and used for detection of  
412 circularized DNAs. N: water; P1: positive control for pLSL.R.Ly; positive control for P2:  
413 pLSLR; Cx: Control samples collected at x dpi; Ixy: infiltrated sample number y collected at x  
414 dpi; I11V: sample collected from leaves infiltrated with pLSLR at 11 dpi. PCRs using primers  
415 specific to GAPDH were used as loading control.

416 **Supplemental Figure 2 Novel systems for HDR improvement.**

417 (A). Single construct system for activation of HDR-related genes involving in HDR repair  
418 pathway. Long intergenic region (LIR) and short intergenic region (SIR) are depicted by color  
419 bars in the bottom.

420 (B). Schematic system and released forms of multiple replicon system. General construction of  
421 multiple replicon complex is designed with 3 LIR and 3 SIR sequences (top panel). Donor  
422 template was cloned in one replicon and the other component for inducing DSBs were placed in

423 the other replicon (middle panel). Three replicons would be formed from the construct (bottom  
424 panel).

425 **Supplemental Figure 3. Morphological appearance of GE0 plants**

426 **Supplemental Figure 4. Circularized DNA replicon released by HDR vectors.**

427 (A) pHR01 replicon.

428 (B) pTC217 replicon.

429 **Supplemental Figure 5. Sanger sequencing data to confirm donor exchanges.**

430 (A) Right junction.

431 (B) Left junction. C1.1, C1.2, C1.3, C1.8, C1.11, C1.12, and C1.17: Independent LbCpf1-based  
432 HDR GE0 events

433 **Supplemental Figure 6. PCR analyses of GE1 plants obtained from GE0 LbCpf1-based HR**  
434 **events.**

435 P: pHR01 plasmid isolated from Agrobacteria; L: 1kb ladder; N: Water control; WT: wild-type  
436 Hongkwang; C1.6.1-C1.6.5: GE1 offspring of event C1.6.; C1.9.1: GE1 offspring of event C1.9;  
437 C1.10.1 and C1.10.2: GE1 offspring of event C1.10; C1.11.1-C1.11.4: GE1 offspring of event  
438 C1.11; C1.12.1-C1.12.5: GE1 offspring of event C1.12; C1.14.1-C1.14.4: GE1 offspring of  
439 event C1.14; C1.15.1 and C1.15.2: GE1 offspring of event C1.15; C1.16.1-C1.16.4: GE1  
440 offspring of event C1.16.

441 **Supplemental Figure 7. Morphological appearance of GE1 plants**

442 **Supplemental Figure 8. Analyses of left and right junction sequences of GE1 plants.**

443 Sanger sequencing data to confirm donor exchanges for right (A) and left (B) junctions of the  
444 GE1 plants are presented.

445 **Supplemental Figure 9. Alignment of targeted regions isolated from the HKT12 events.**



446 18/25 events (highlighted in yellow) showed strong double peaks indicating single/bi-allelic  
447 mutations. 6/25 events showed clearly bi-allelic mutations. C77 showed weak (30%) double  
448 peaks. C83 and C105 showed large truncations.

449 **Supplemental Figure 10. Timeline and contents of *Agro*-mediated transformation protocol**  
450 **used in this work.**

451 Step by step protocol is presented with each number in the circles indicates number of days after  
452 seed sowing (upper panel) and treatments used in each steps are shown in below panel.

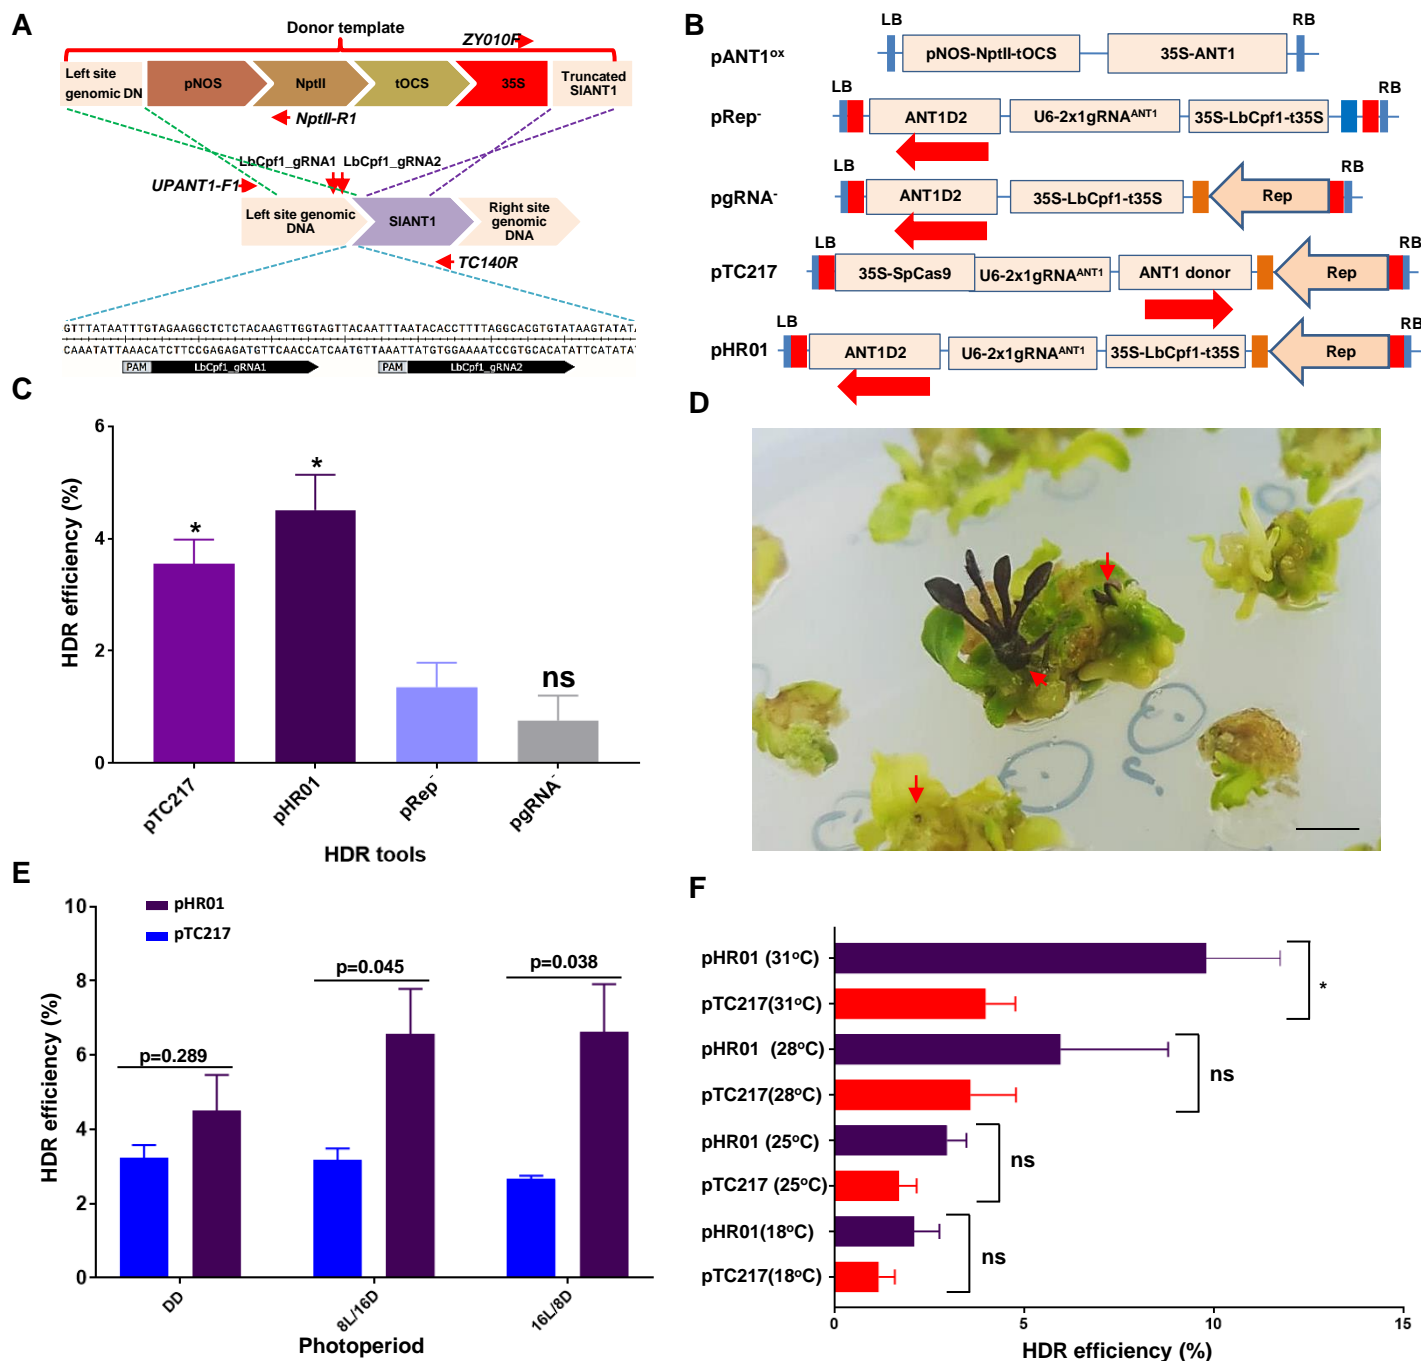

**Figure 1. HDR-based genome editing of ANT1 locus.**

(A) Representatives of ANT1 targeting sites and homologous DNA donor template construction. The upstream sequence of ANT1 locus (middle panel) was selected for targeting by HDR. Two guide RNAs were used (depicted by two vertical arrows on the middle panel and sequence details in bottom panel). Kanamycin expression cassette (pNOS-NptII-tOCS) and CaMV 35S promoter was designed to be inserted at a position 142 bp upstream of ANT1 start codon.

(B) T-DNA constructs used for HDR improvement experiments. The dual guide RNA scaffold ( $2x1gRNA^{ANT1}$ ) was driven by Arabidopsis U6 promoter core element (75bp). LbCpf1 expression cassette was re-engineered to contain Arabidopsis Ubiquitin 1 intron I downstream of CaMV 35S promoter and upstream of LbCpf1 and to be terminated by CaMV 35S terminator (35S-LbCpf1-t35S). Red and orange boxes show long intergenic region and short intergenic region of geminivirus DNA.

(C) HDR efficiency comparison among different constructs.

(D) Representative photograph of HDR edited T0 events indicating as purple calli (red arrows) or direct HDR shoot formation (purple arrow). Scale bar = 5 mm.

(E) Impact of photoperiod on HDR. Tomato cotyledon fragments transformed were incubated under different lighting regimes for the first 10 days post-washing. DD: continuous darkness; 8L/16D: 8 hours-lighting/16 hours-darkness; 16L/8D: 16 hours-lighting/8 hours-dark.

(F) HDR efficiencies of pTC217 and pHR01 construct obtained in various temperatures. HDR efficiencies were recorded in at least triplicates, calculated and plotted using PRISM 7.01 software (details of statistical analyses are described in Material and Methods section). \*: significantly different ( $p < 0.05$ ); ns: not significantly different; p values are showing on the top of the bars of (F) for comparisons.

Data in (B), (E) and (F) are represented as mean  $\pm$  SEM.

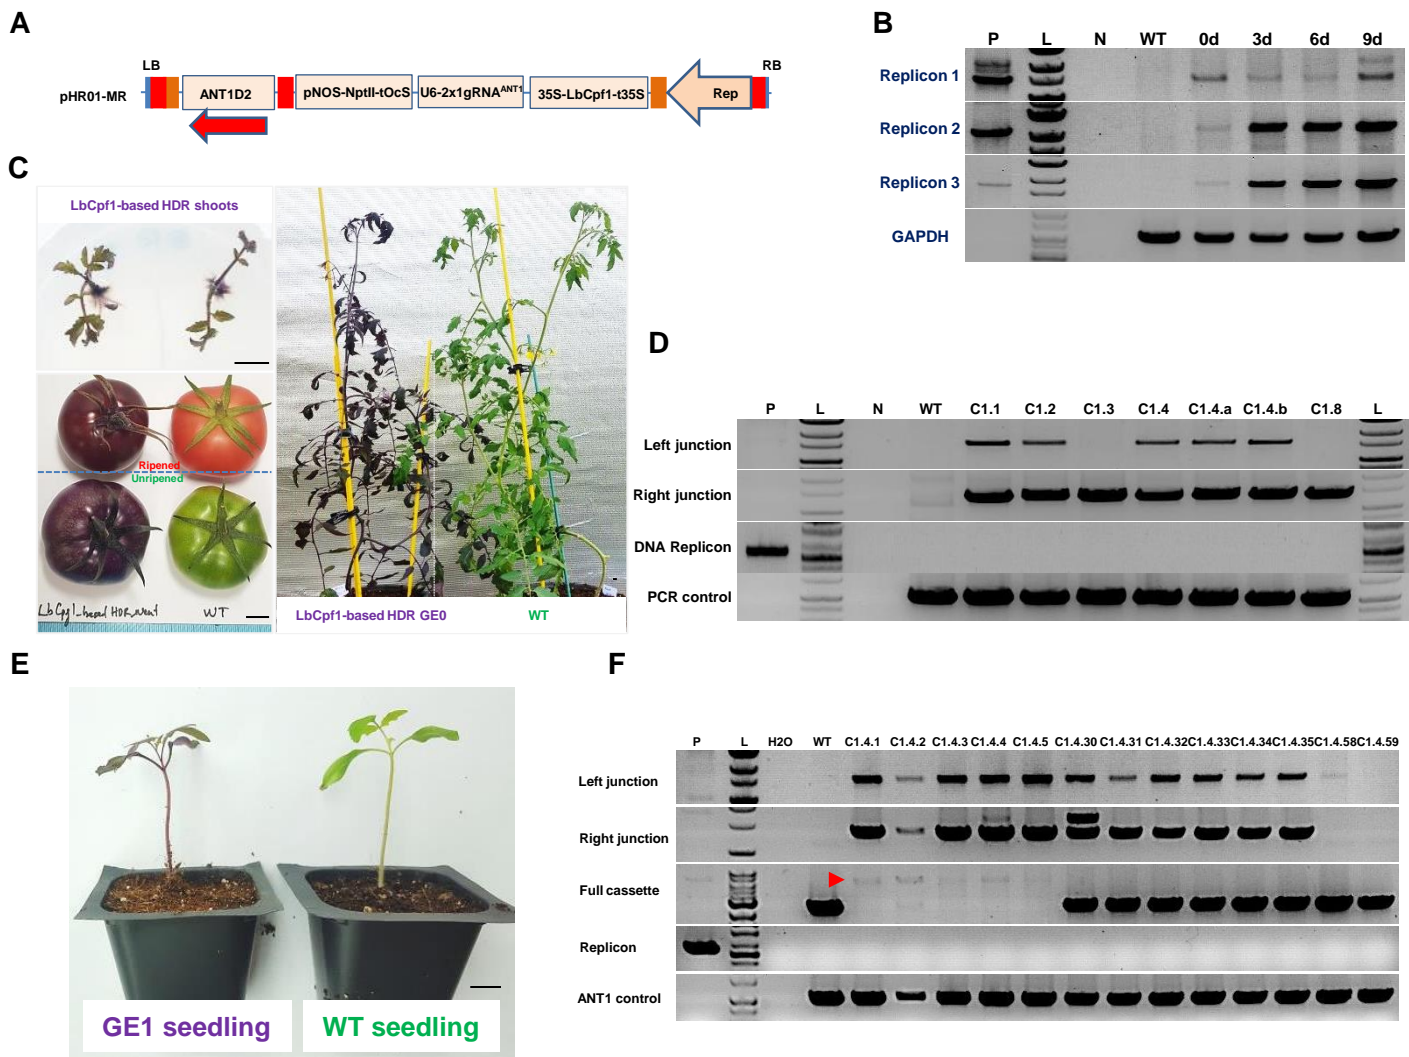

**Figure 2. Novel approaches for HDR improvement and analyses of the HDR edited plants.**

(A) Multi-replicon construct tested for improvement of HDR over NHEJ. Red and orange boxes show long intergenic region and short intergenic region of geminivirus DNA.

(B) PCR detection of circularized replicons simultaneously released from multiple replicon vector (pHR01-MR). 0d, 3d, 6d and 9d: samples collected at 0, 3, 6 and 9 days post transformation with *Agrobacterium* carrying pHR01-MR.

(C) Representative HDR edited plant in greenhouse conditions and their fruits. Scale bars = 1 cm.

(D) PCR analysis data of some representative HDR independent events.

(E) Generation 1 of the HDR edited events (GE1). GE1 plant (left) germinated in soil pot in comparison with wild-type plant (right). Scale bar = 1 cm.

(F) PCR analysis data of some GE1 offspring of C1.4 event. P: pHR01 plasmid isolated from *Agrobacterium*; L: 1kb ladder; N: water control; WT: wild-type tomato Hongkwang; C1.1, C1.2, C1.3, C1.8: Independent LbCpf1-based HDR GE0 events; C1.4.1, C1.4.2, C1.4.3, C1.4.4 and C1.4.5: GE1 plants, showing dark purple color, obtained from self-pollination of the event C1.4.

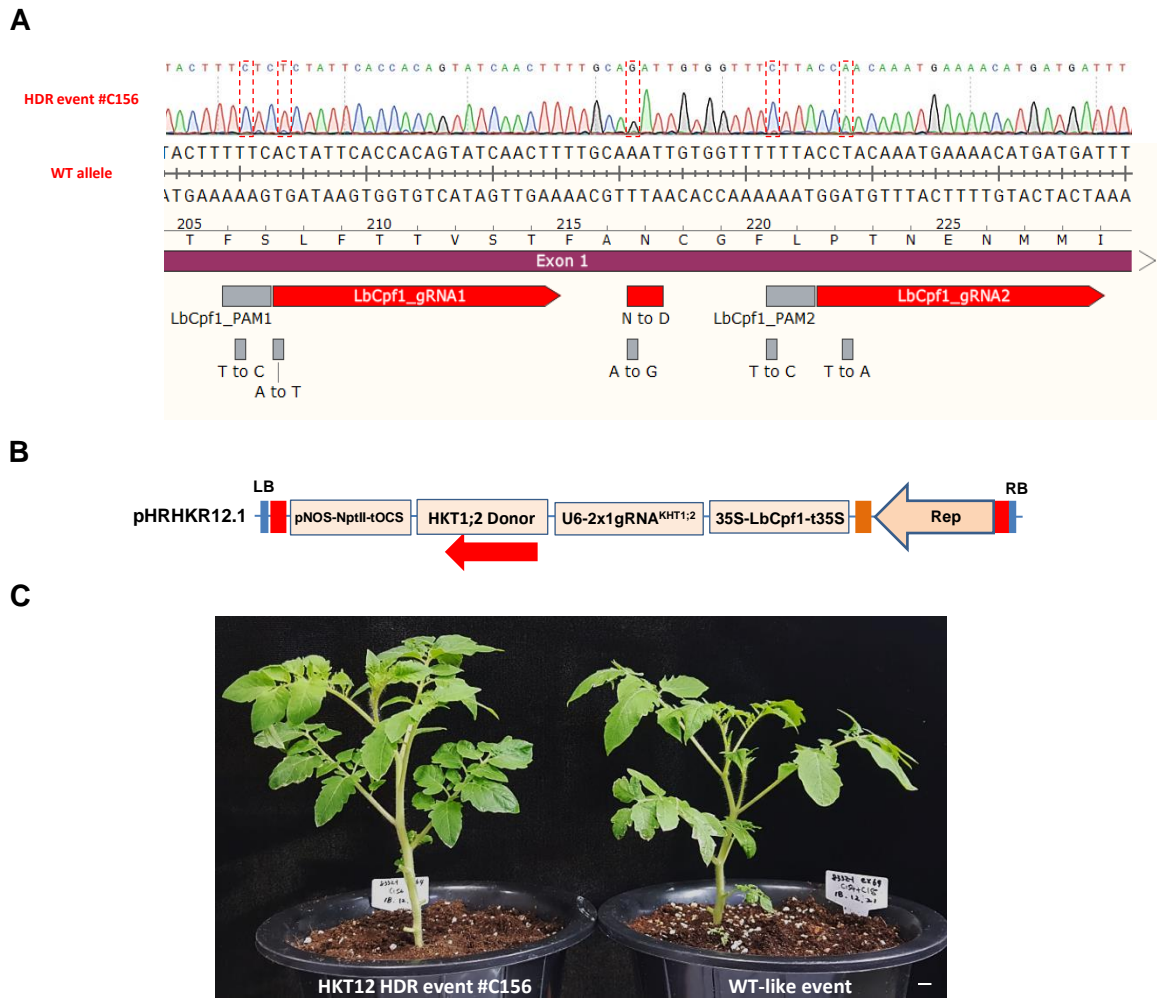

**Figure 3. HKT1;2 N217D allele editing by HDR using the CRISPR/Cpf1-based replicon system.**

- (A) Sanger sequencing of the event #C156 showing perfectly edited HKT1;2 N217 to D217 allele with WT allele as a reference. The nucleotides highlighted in the discontinuous red boxes denote intended modifications for N217D; PAM and core sequences (to avoid re-cutting).
- (B) HDR construct layout for HKT1;2 editing. There is neither selection nor visible marker integrated into the donor sequence. The *NptII* marker was used for enrichment of transformed cells.
- (C) Morphology of the HKT1;2 N217D edited event compared to its parental WT in greenhouse conditions. Scale bar = 1 cm.

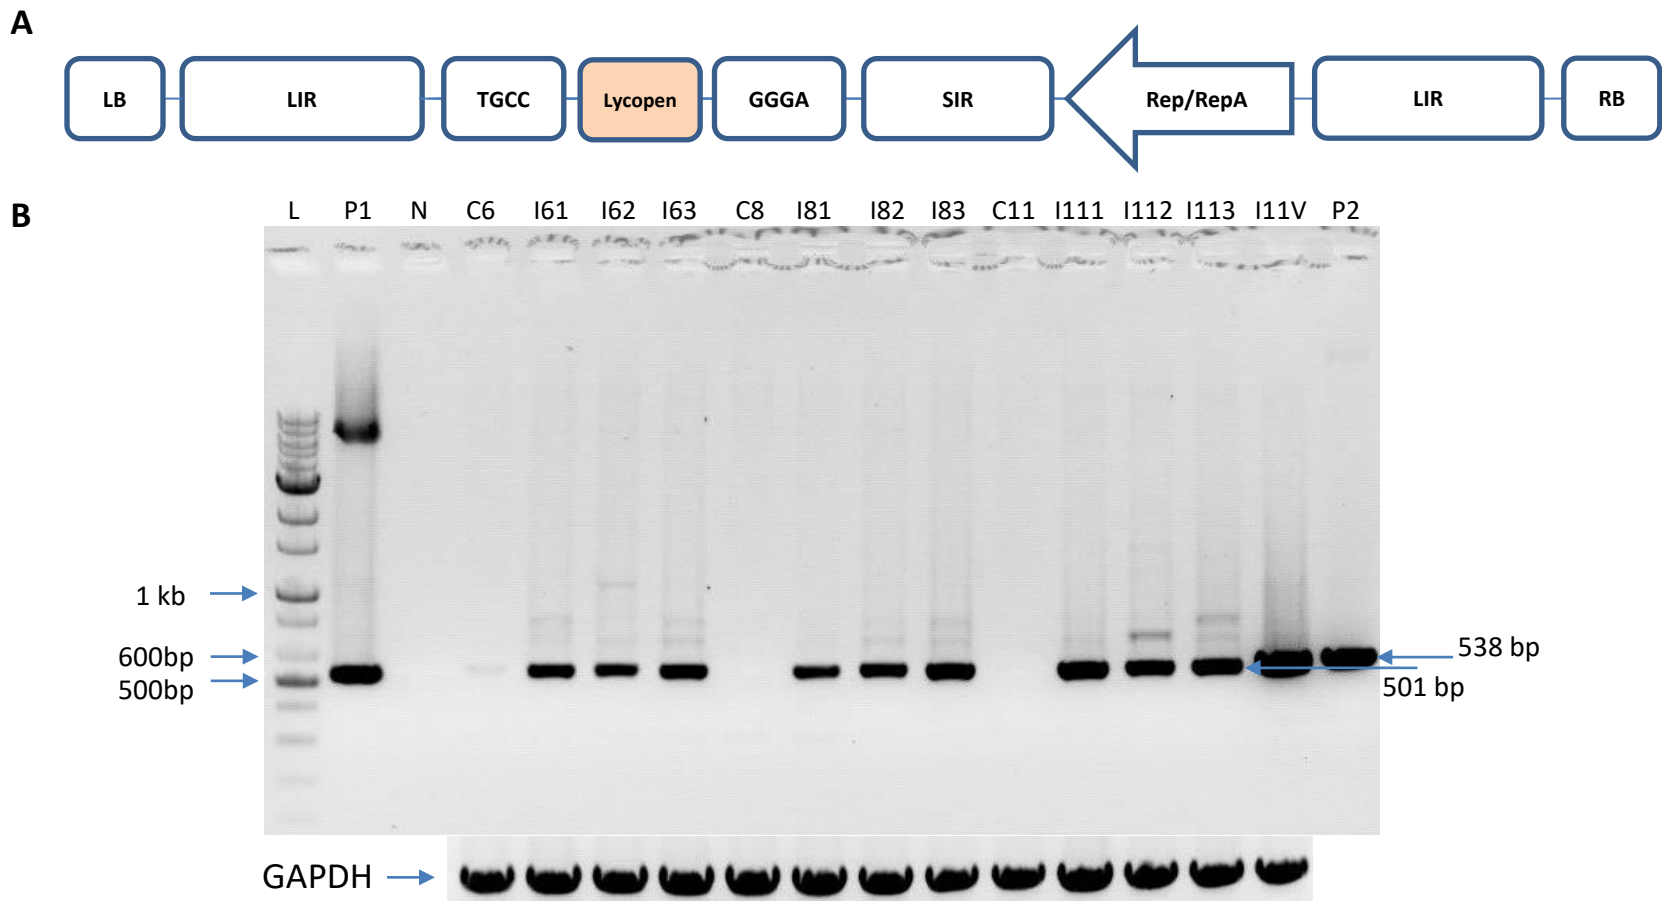

### Supplemental Figure 1

#### The *de novo* engineered geminiviral amplicon (named as pLSL.R.Ly) and its replication in tomato.

(A) Map of pLSL.R.Ly. The DNA amplicon is defined by its boundary sequences (Long Intergenic Region, LIR) and a terminated sequence (Short Intergenic Region, SIR). The replication associated protein (Rep/RepA) is expressed from the LIR promoter sequence. All of the expression cassettes of HDR tools were cloned into the vector by replacing the red marker (Lycopene) using a pair of type IIS restriction enzyme (Bpil, flanking ends are TGCC and GGGGA). Left (LB) and right (RB) denote the borders of a T-DNA. (B) Circulated DNA detection in tomato leaves infiltrated with pLSL.R.Ly compared to that of pLSLR. Agrobacteria containing the plasmids were infiltrated into tomato leaves (Hongkwang cultivar) and infiltrated leaf were collected at 6, 8 and 11 dpi and used for detection of circulated DNAs. N: water; P1: positive control for pLSL.R.Ly; positive control for P2: pLSLR; Cx: Control samples collected at x dpi; Ixy: infiltrated sample number y collected at x dpi; I11V: sample collected from leaves infiltrated with pLSLR at 11 dpi. PCRs using primers specific to GAPDH were used as loading control.

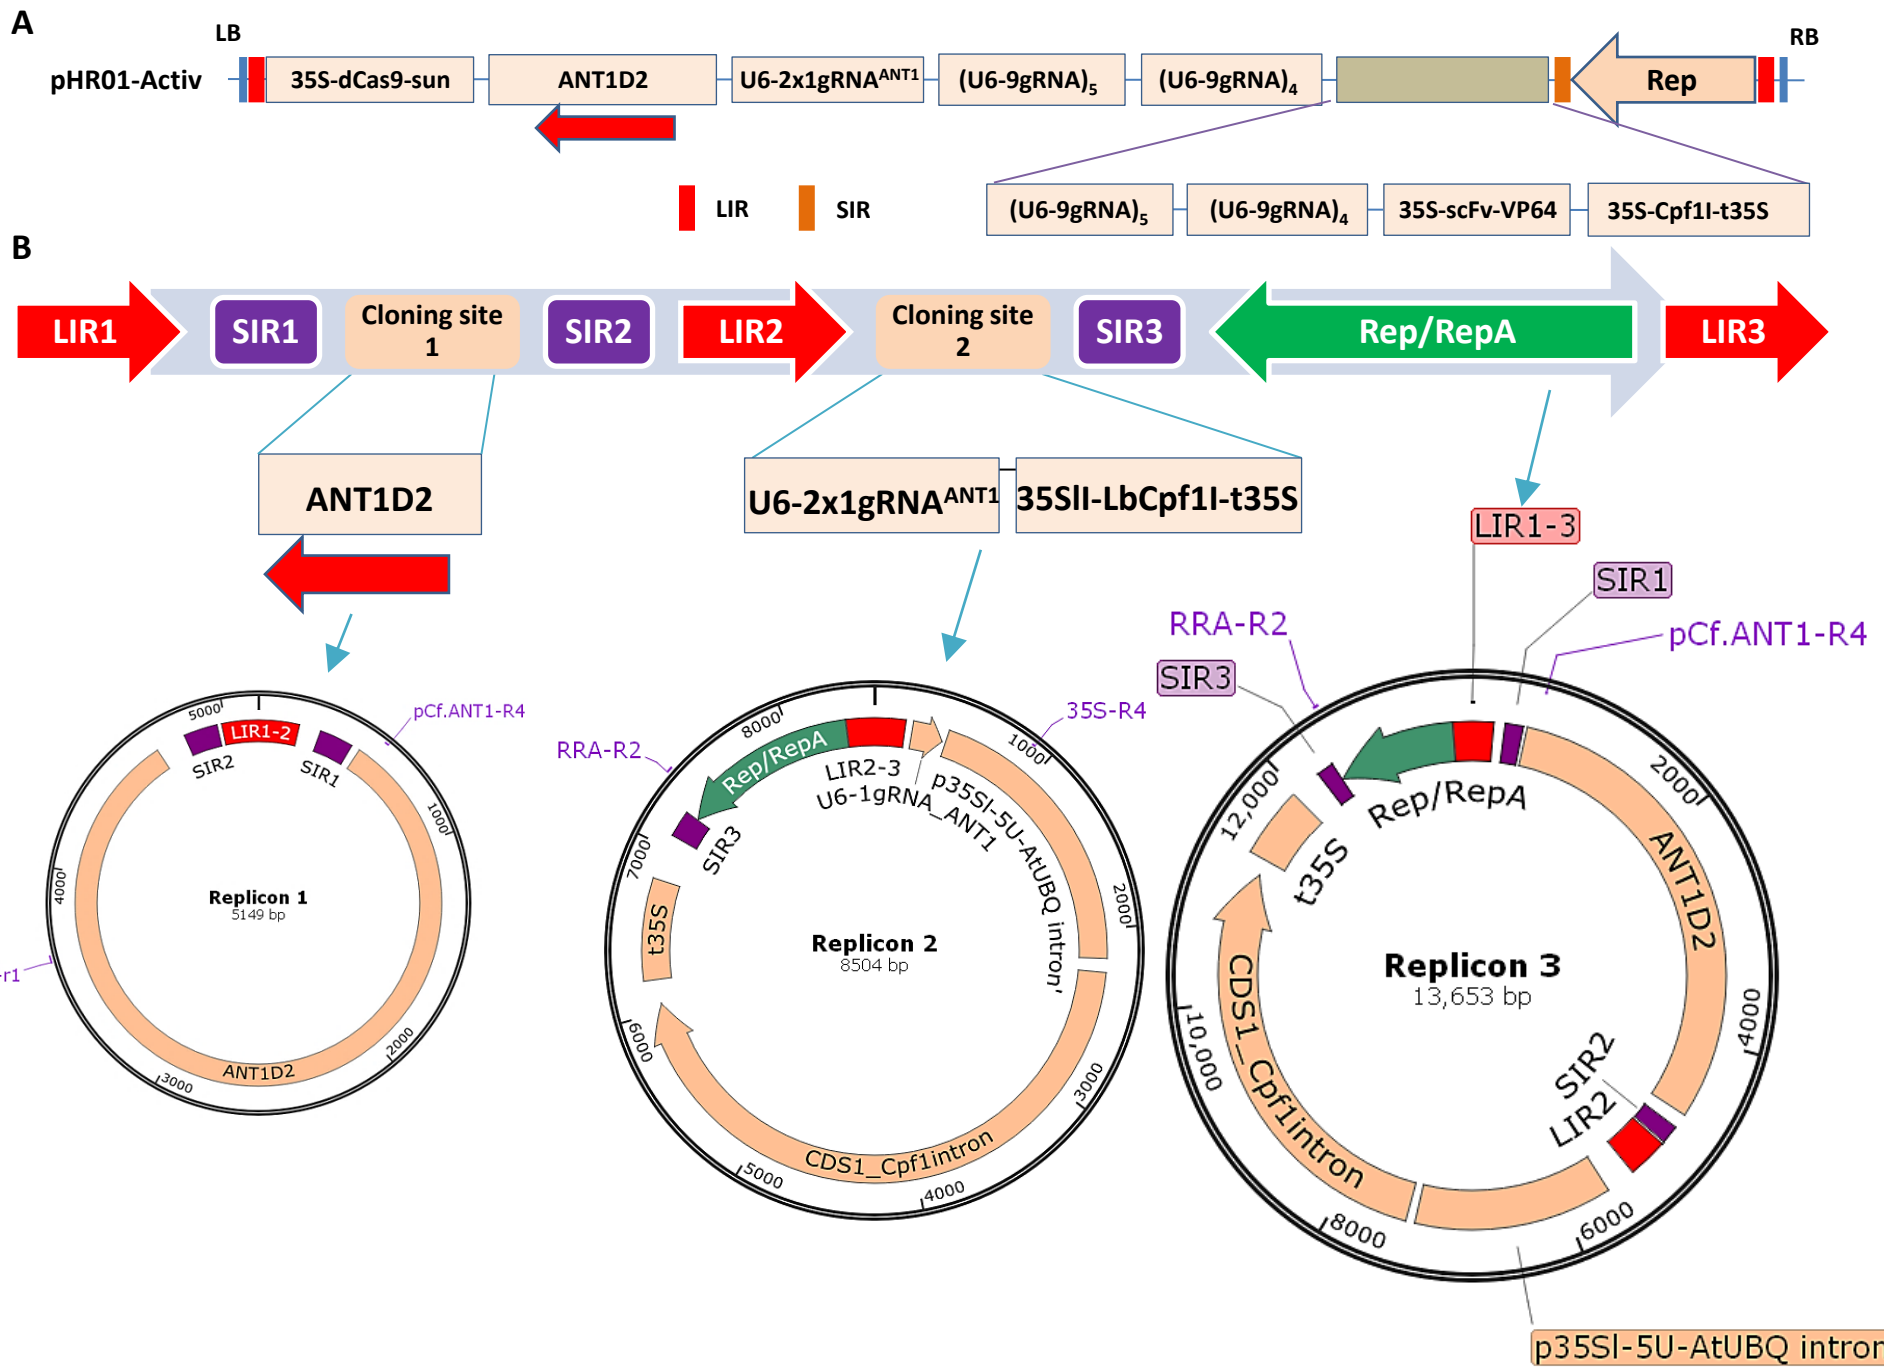

## Supplemental Figure 2

### Novel systems for HDR improvement.

(A) Single construct system for activation of HDR-related genes involving in HDR repair pathway. Long intergenic region (LIR) and short intergenic region (SIR) are depicted by color bars in the bottom. (B) Schematic system and released forms of multiple replicon system. General construction of multiple replicon complex is designed with 03 LIR and 03 SIR sequences (top panel). Donor template was cloned in one replicon and the other component for inducing DSBs were placed in the other replicon (middle panel). Three replicons would be formed from the construct (bottom panel).

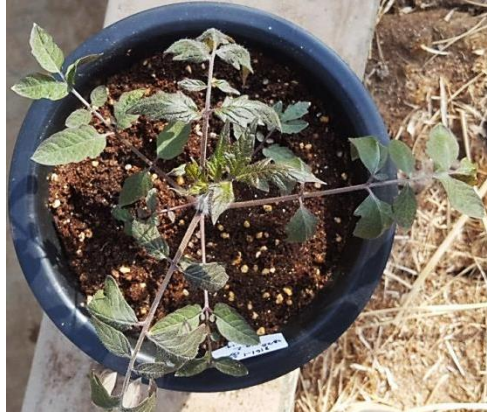

HDR GE0 plant hardening in vermiculite pot

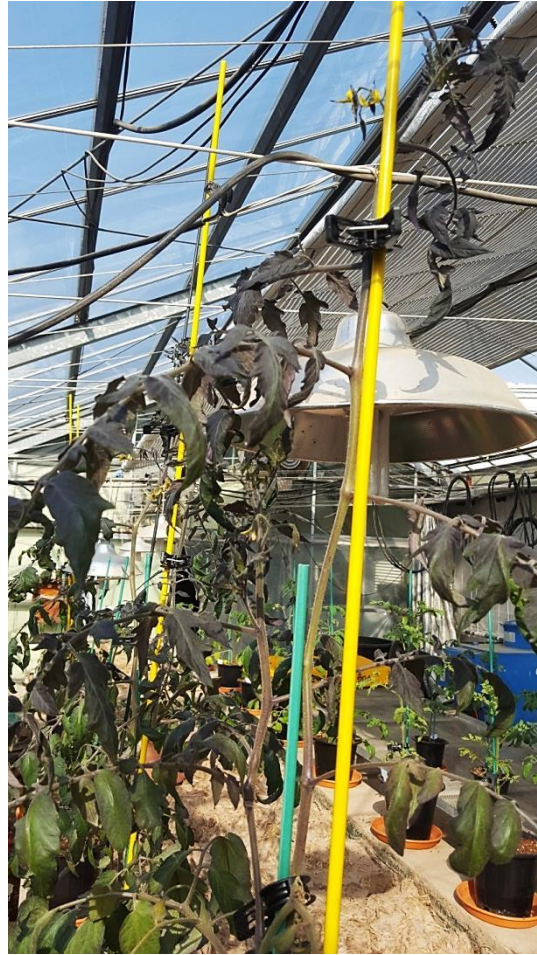

HDR GE0 plant in greenhouse conditions

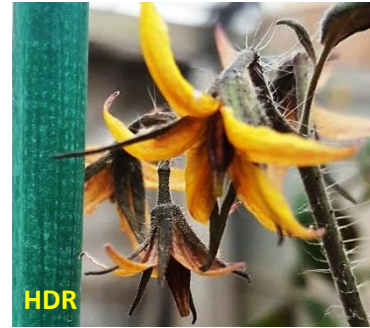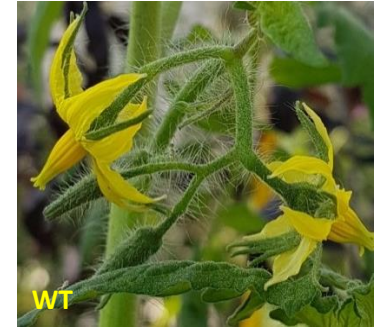

Flowers of HDR GE0 compared to wildtype plant

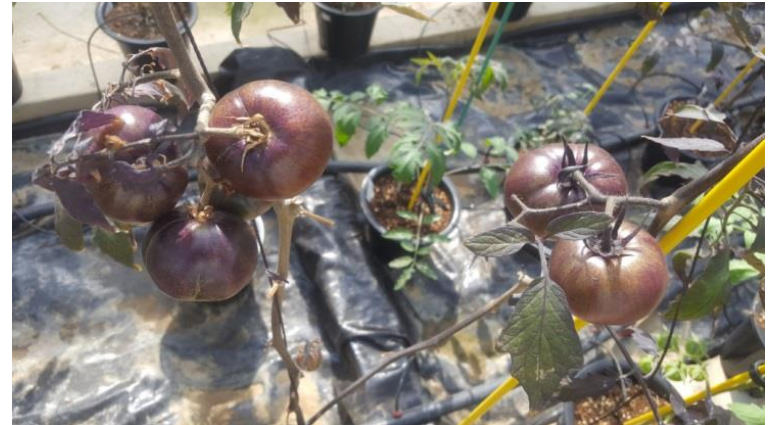

Fruits of HDR plant event C1.4

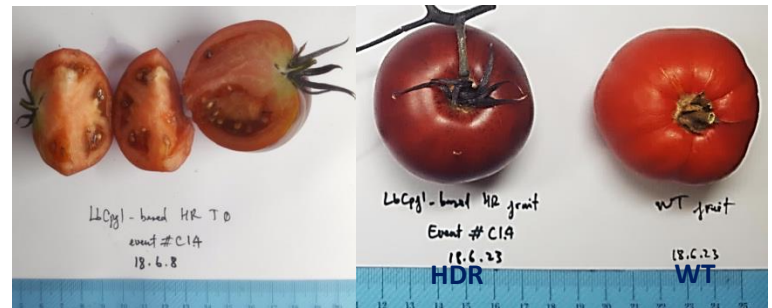

Fruit slices of HDR plant Fruit of HDR GE0 vs. wildtype plant

### Supplemental Figure 3 Morphological appearance of GE0 plants.



a

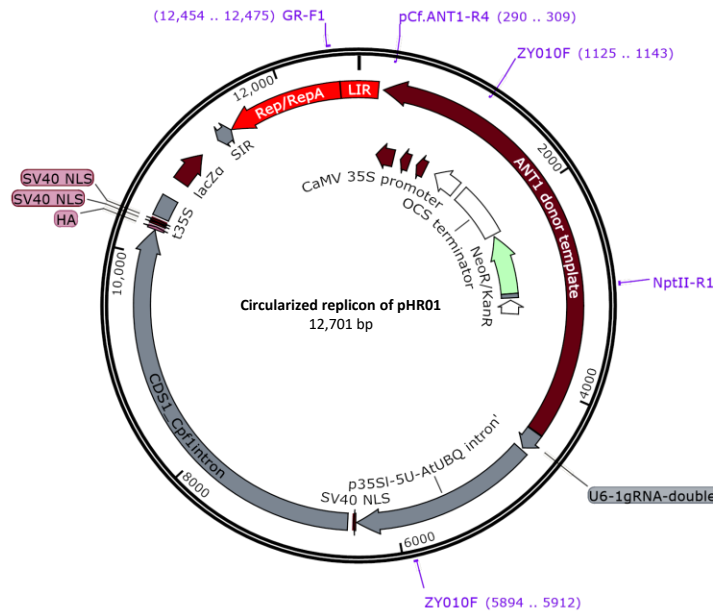

b

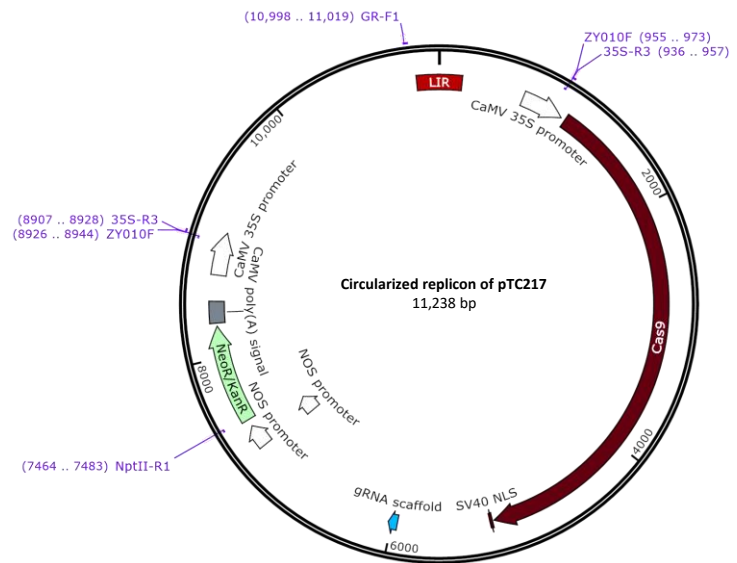

## Supplemental Figure 4

**Circularized DNA replicon released by HDR vectors.**

(A) pHR01 replicon. (B) pTC217 replicon.

**A**

Donor template

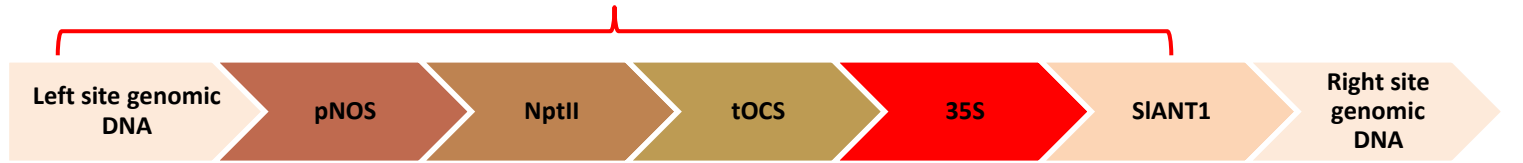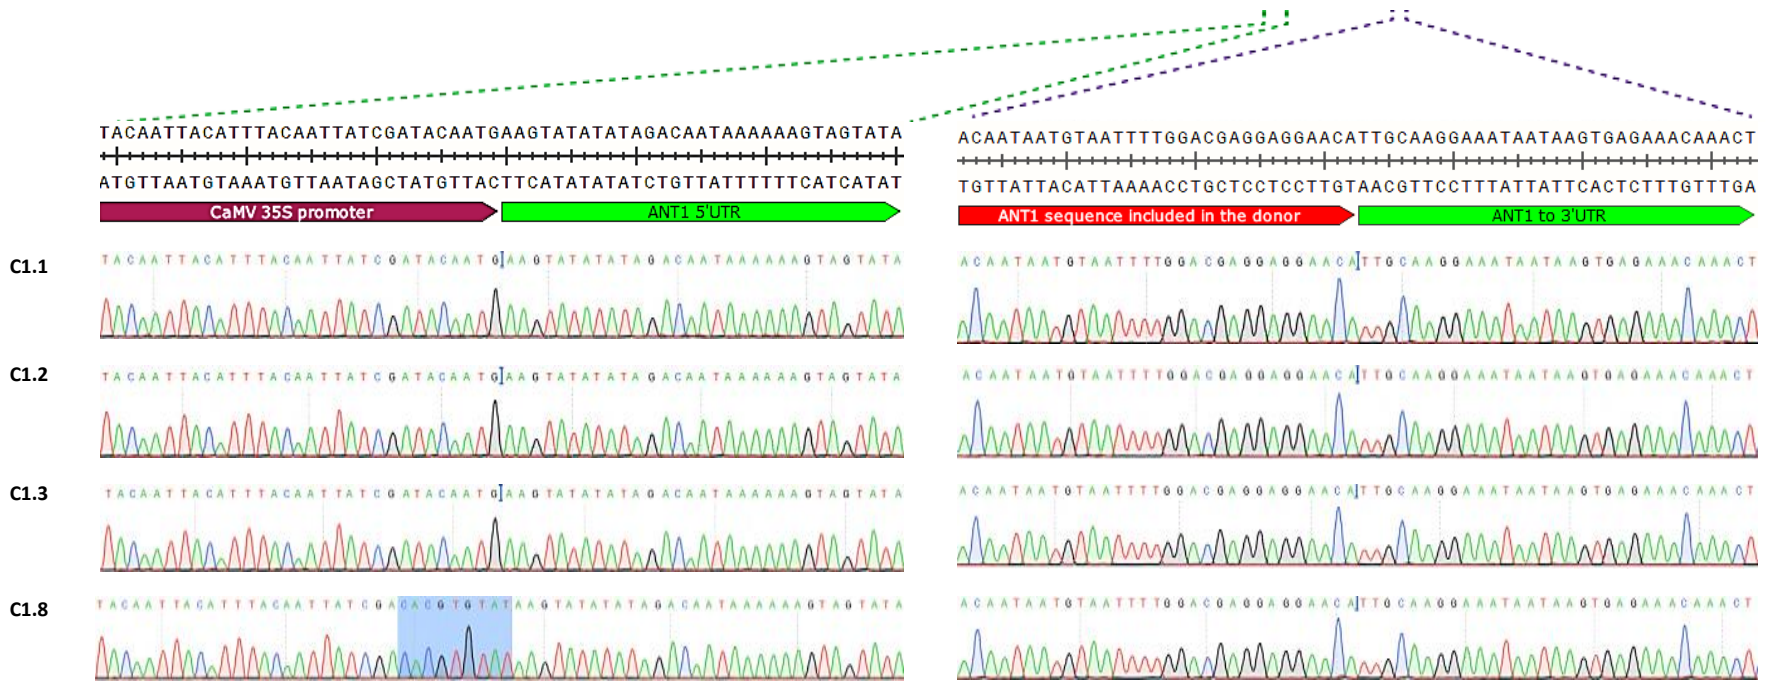

**Supplemental Figure 5**  
**Sanger sequencing data to confirm donor exchanges.**  
**(A) Right junction.**

**B****Donor template**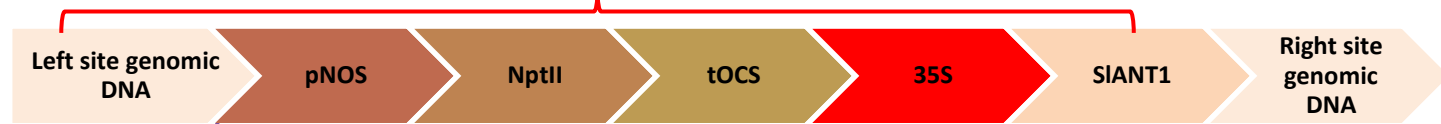

TAGATGAAGGAGTATTTACTATTCAACCACAACACTTGTCTGGTGAGATTA  
 ATCTACTTCCTCATAAATGATAAGTTGGTGTGTGAACAGCCACTCTAAT

sequence included in the donor

AGCCGTTTTACGTTTGAACTGACAGAACC GCAACGTTGAAGGAGCCACT  
 TCGGCAAATGCAAACCTTGACTGTCTTGGCGTTGCAACTTCCTCGGTGA

NOS promoter

C1.1

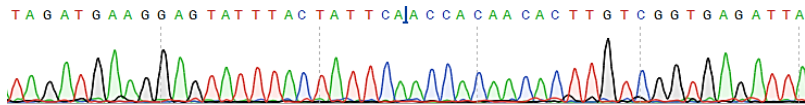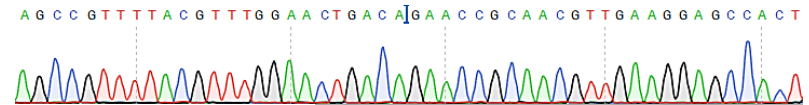

C1.11

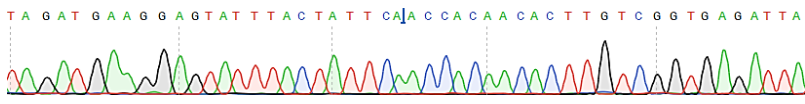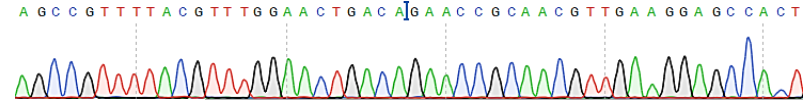

C1.12

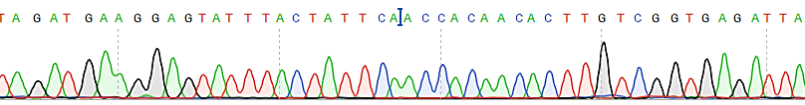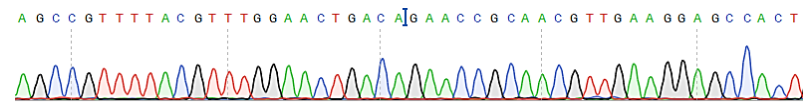

C1.17

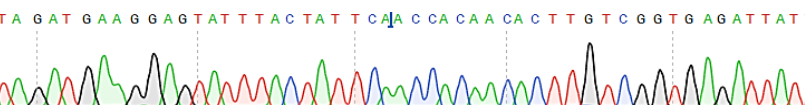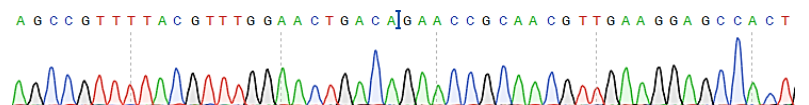

### Supplemental Figure 5 (Continued)

#### Sanger sequencing data to confirm donor exchanges.

(B) Left junction. C1.1, C1.2, C1.3, C1.8, C1.11, C1.12, and C1.17: Independent LbCpf1-based HDR GE0 events

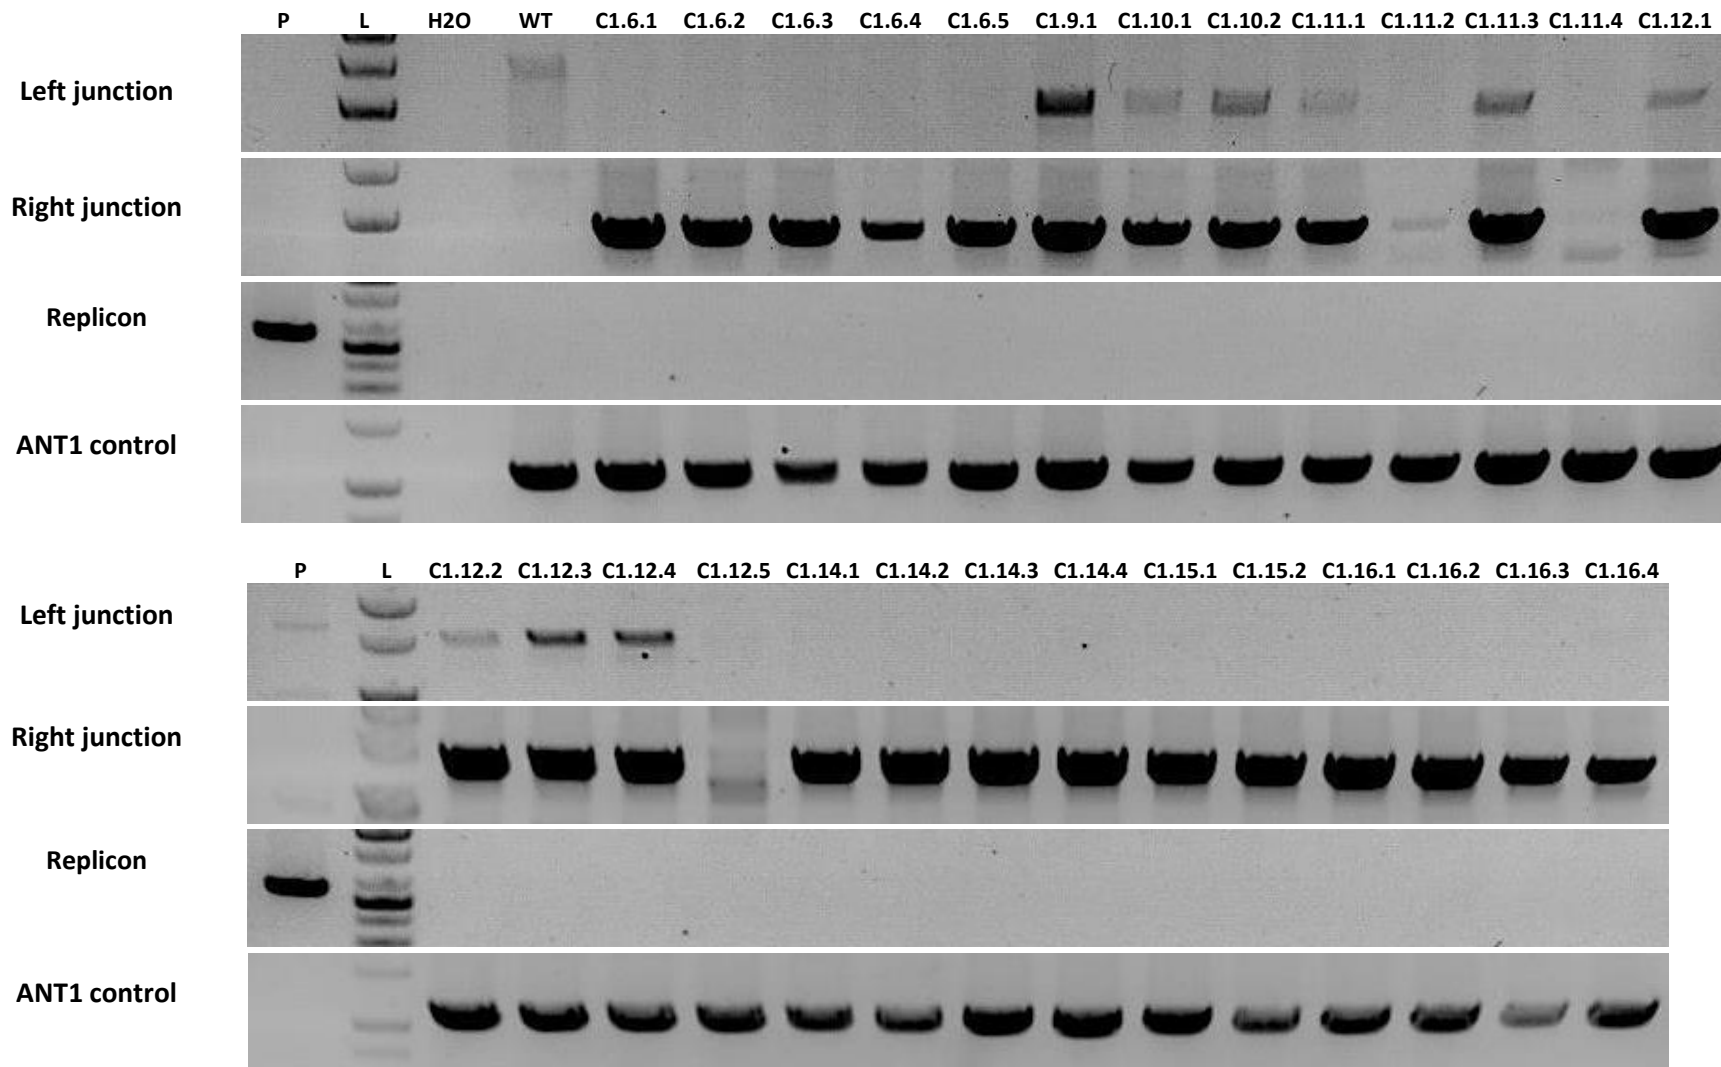

### Supplemental Figure 6

#### PCR analyses of GE1 plants obtained from GE0 LbCpf1-based HR events .

P: pHR01 plasmid isolated from Agrobacteria; L: 1kb ladder; N: Water control; WT: wildtype Hongkwang; C1.6.1-C1.6.5: GE1 offspring of event #C1.6.; C1.9.1: GE1 offspring of event #C1.9; C1.10.1 and C1.10.2: GE1 offspring of event #C1.10; C1.11.1-C1.11.4: GE1 offspring of event #C1.11; C1.12.1-C1.12.5: GE1 offspring of event #C1.12; C1.14.1-C1.14.4: GE1 offspring of event #C1.14; C1.15.1 and C1.15.2: GE1 offspring of event #C1.15; C1.16.1-C1.16.4: GE1 offspring of event #C1.16.

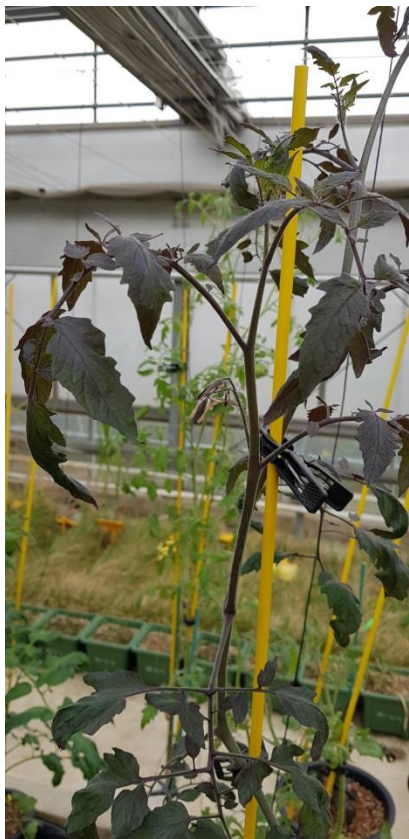

Heterozygous HDR GE1 plant  
(htHDR)

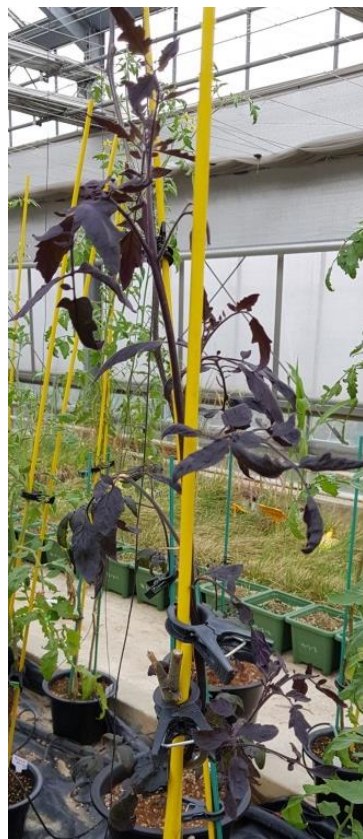

Homozygous HDR GE1 plant  
(hmHDR)

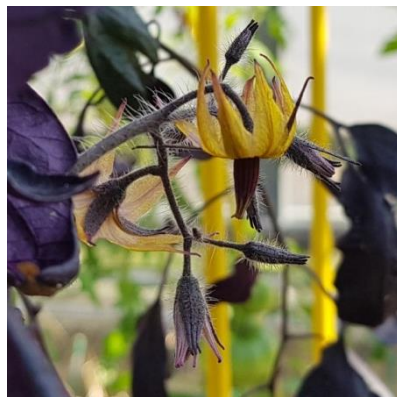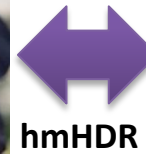

hmHDR

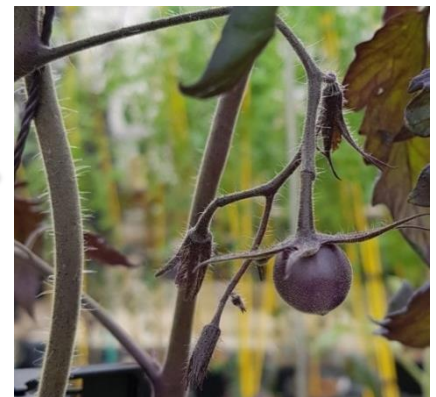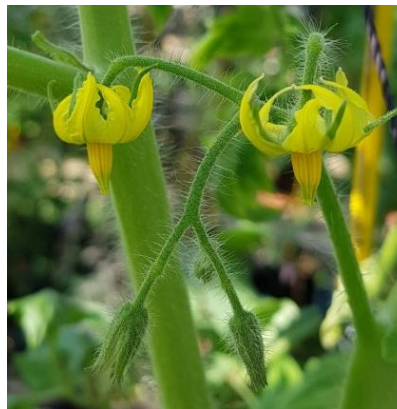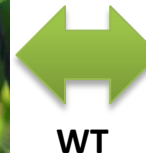

WT

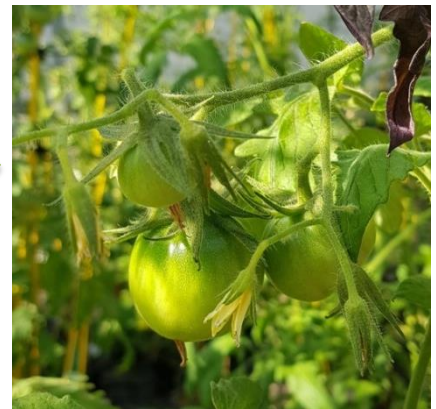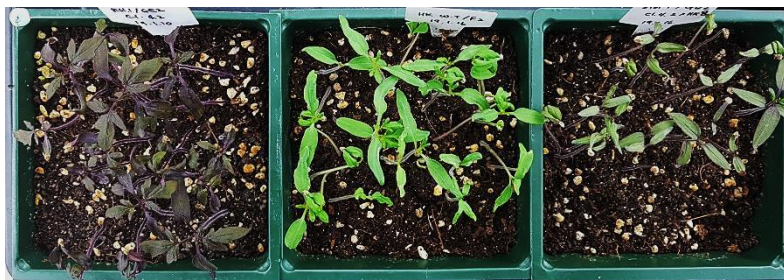

Phenotypes of GE2 plants compared to WT. GE2 offspring (left) of  
hmHDR GE1 plant back-crossed with WT (middle) resulted in all  
htHDR BC1F1 plants

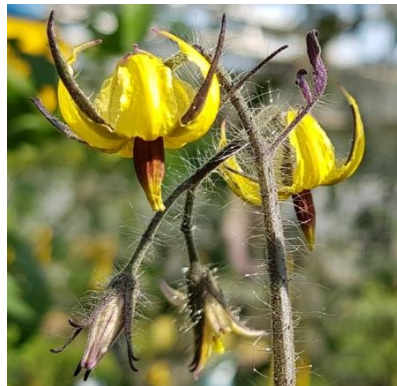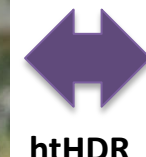

htHDR

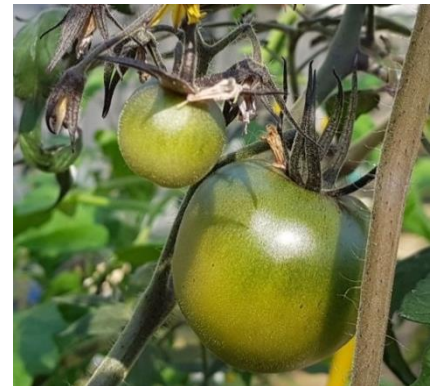

### Supplemental Figure 7 Morphological appearance of GE1 plants

**A**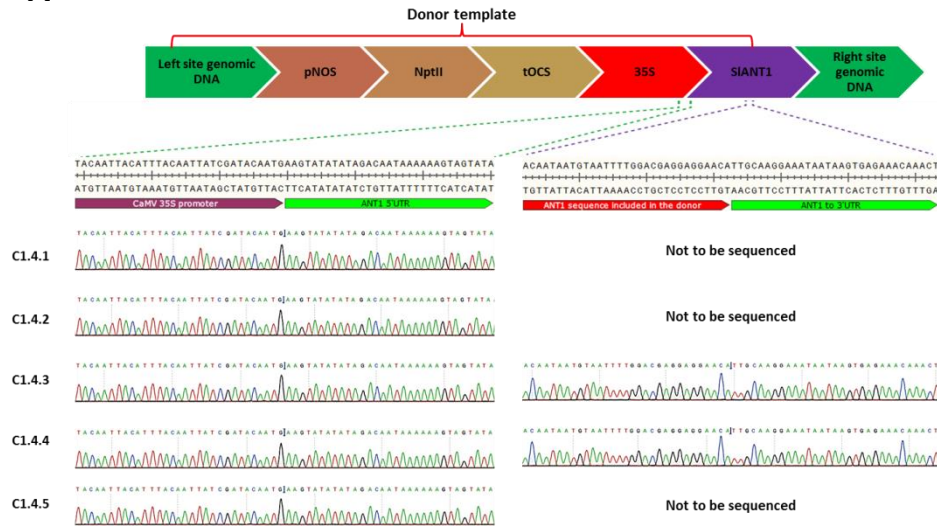**B**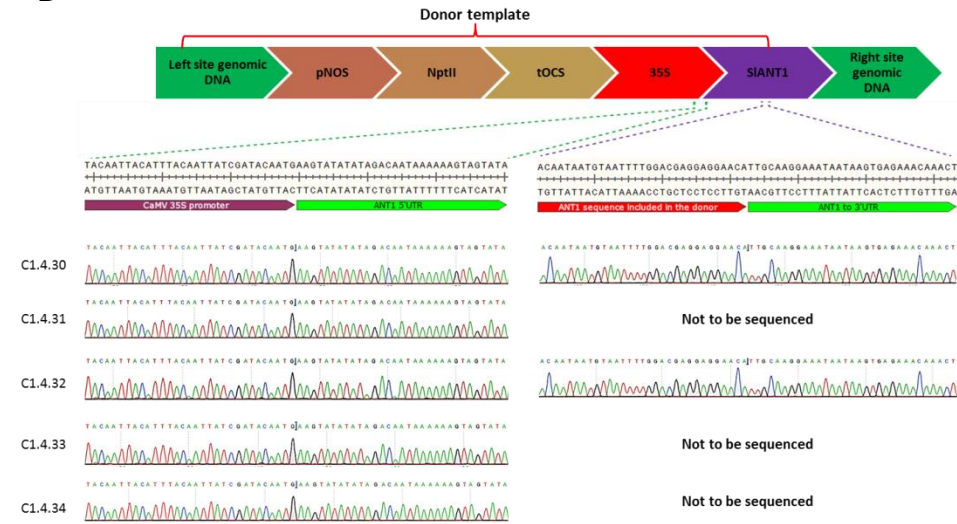

## Supplemental Figure 8

### Analyses of left and right junction sequences of GE1 plants.

Sanger sequencing data to confirm donor exchanges for right (**A**) and left (**B**) junctions of the GE1 plants are presented

|          |     |                                                                                                         |
|----------|-----|---------------------------------------------------------------------------------------------------------|
| HKT12 WT | 273 | <del>CCACAGTATCAACTTTTGGCAAATTGTGG--TTTTTTACCTACAAATGAAAACATGATGAT</del>                                |
| C53      | 241 | ..... <del>---</del> .....TTTN.....T... <del>---</del> .....TTT...T...TG.A.....                         |
| C61      | 241 | ..... <del>---</del> .....TTTN.....T... <del>---</del> .....TTT...T...TG.A.....                         |
| C70      | 241 | NA.TG. <del>-----</del> .....AC. <del>--C</del> ..NAC <del>---</del> C.C.A.CTT.A... <del>-----</del> .A |
| C73      | 240 | ..... <del>---</del> .....TTTN.....T... <del>---</del> .....TTT...T...TG.A.....                         |
| C74      | 240 | ..... <del>---</del> .....TTTN.....T... <del>---</del> .....TTT...T...TG.A.....                         |
| C75      | 239 | ..... <del>---</del> .....TTTN.....T... <del>---</del> .....TTT...T...TG.A.....                         |
| C76      | 107 | <del>-----</del> .....G... <del>---</del> .....TCN...NN... <del>-----</del> N.                          |
| C77      | 240 | ..... <del>---</del> .....TTTN.....T... <del>---</del> .....TTT...T...TG.A.....                         |
| C78      | 240 | .....TTNT.....TGGT.T.TN <del>---</del> C.G.A.TGAT.T...                                                  |
| C82      | 239 | .....TG.....G.GTTT.A.C <del>---</del> .....GAN.C.NG.G.TTT...                                            |
| C83      | 243 | ..... <del>---</del> .....TTTN.....T... <del>---</del> .....TTT...T...TG.A.....                         |
| C84      | 240 | ..... <del>---</del> .....TTTN.....T... <del>---</del> .....TTT...T...TG.A.....                         |
| C85      | 239 | ..... <del>-----</del> .....N.N <del>---</del> N.T.G.T.GGTTT.AC..                                       |
| C86      | 240 | ..... <del>-----</del> .....NNN <del>---</del> T.G.T.GNTTT.AN.                                          |
| C92      | 109 | <del>-----</del> .....G... <del>---</del> .....N.TCT.NN... <del>-----</del> NN                          |
| C95      | 239 | ..... <del>---</del> ..NN...GN..N.G <del>---</del> N...NN.NNNN..N.G...NNN.GNNNN                         |
| C96      | 239 | ..... <del>---</del> .....TTTN.....T... <del>---</del> .....TTT...T...TG.A.....                         |
| C97      | 241 | ..... <del>-----</del> .....NN... <del>---</del> ..... <del>-----</del>                                 |
| C104     | 240 | ..... <del>---</del> ..G...NGNG...T <del>---</del> G... <del>-----</del>                                |
| C105     | 244 | ..G.NCN.G..NGC..C. <del>---</del> N.GG.GCC <del>---</del> NNN.CNN...N.NNNA.NCNN..T.CNN.                 |
| C106     | 233 | <del>-----</del> .....N...N <del>---</del> N...TGC..N... <del>-----</del> ..NG.N.                       |
| C109     | 240 | ..... <del>---</del> .....TTTN.....T... <del>---</del> .....TTT...T...TG.A.....                         |
| C111     | 239 | ..... <del>-----</del> .....TGC.....GT...C... <del>-----</del> ...GA..                                  |
| C113     | 240 | ..... <del>---</del> .....TTTN.....T... <del>---</del> .....TTT...T...TG.A.....                         |
| C114     | 238 | <del>---</del> GNNTT.T.ACC.....G...N... <del>---</del> A.GA.T... <del>---</del> NN..N...C.              |

## Supplemental Figure 9

### Alignment of targeted regions isolated from the HKT12 events.

18/25 events (highlighted in yellow) showed strong double peaks indicating single/bi-allelic mutations. 6/25 events showed clearly bi-allelic mutations. C77 showed weak (30%) double peaks. C83 and C105 showed large truncations.

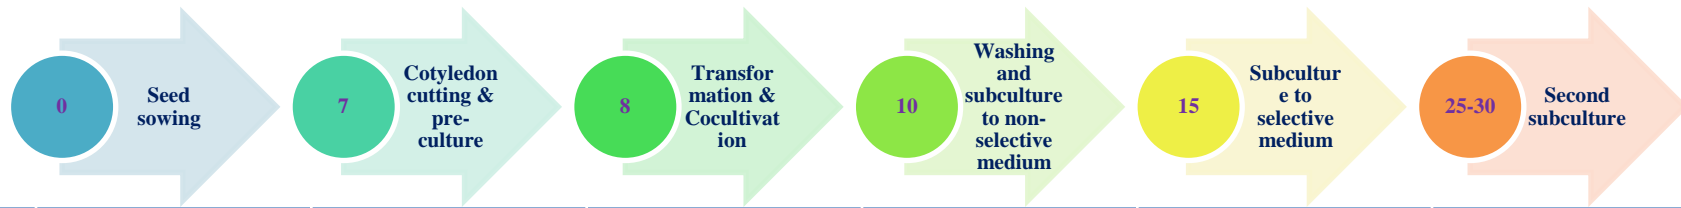

| Stage            | Germination                 | Pre-culture, calli induction | Co-cultivation, calli induction | Non-selection, calli induction | Selection, calli induction and shoot regeneration | Selection, shoot formation and elongation |
|------------------|-----------------------------|------------------------------|---------------------------------|--------------------------------|---------------------------------------------------|-------------------------------------------|
| Medium           | MSO                         | PREMC,                       | ABM-MS                          | NSEL                           | SEL5                                              | SEL5R                                     |
| Temperature (°C) | 25±2                        | 25±1                         | 25±1                            | 31±1                           | 28±1 for 5 days and then 25±2                     | 25±2                                      |
| Photoperiod      | 2 days-dark and then 16L/8D | 1 day dark                   | 2 days -dark                    | 5 days-dark                    | 5 days-8L/16D                                     | 16L/8D                                    |
| Data collection  | -                           | -                            | Sampling at 0dpt                | Sampling at 3dpt and 6dpt      | Sampling at 9dpt, Purple spot counting at 21 dpt  | True shoot record                         |

### Supplemental Figure 10

#### Timeline and contents of *Agro*-mediated transformation protocol used in this work.

Step by step protocol is presented with each number in the circles indicates number of days after seed sowing (upper panel) and treatments used in each steps are shown in below panel.



**Supplemental Table 1.** Targeted genes and guide RNAs used in HDR activation experiment.

| No. | Gene name | Accession number | Guide RNA1 sequence<br>(5'-3') | Guide RNA2 sequence<br>(5'-3') |
|-----|-----------|------------------|--------------------------------|--------------------------------|
| 1   | SIMRE11   | SL09G009340      | ATCAAGTTAACGTTTATCTT           | ATTAGAGATTATAAATTTAA           |
| 2   | RAD51D    | SL11G073220      | TTTACAATAATATATAGTAA           | AAGTTGTTAGCTAGAGTTTC           |
| 3   | XRRC2     | SL01G008520      | TTTTAAAAGAAAAATTTAA            | ATACATATTTATGTTTGTTA           |
| 4   | BRCA2     | SL02G050200      | TGCCCAACTAACGCTCAAAA           | TGATAATAACAAAAATGACG           |
| 5   | RAD54     | SL04G056410      | AAAAAAATTTGTATGTTGTT           | TATTATTTTATGTTATTGTT           |
| 6   | ATM       | SL03G112940      | TAGCATATGACCAAATAAA            | TAACAAAACAGAAAAAGAAG           |
| 7   | RAD51     | SL07G017540      | ATGTGACCCAATACTTTAAG           | TATACCCTTAAACTATATTC           |
| 8   | RAD52-1   | SL08G005060      | TTCTATGCATAAATAATTAA           | GAGAGAAAGAAGCCTCCTCA           |
| 9   | RAD51B    | SL11G072610      | AGCTCTAAATGATAAAGTTG           |                                |

**Supplemental Table 2.** Primers for LbCpf1-based HR event analyses

| No. | Product        | Primer name | Sequence (5'-3')       | Product length (bp) |
|-----|----------------|-------------|------------------------|---------------------|
| 1   | Left junction  | UPANT1-F1   | TGCGATGATCTACGGTAACAAA | 1485                |
| 2   |                | NPTII-R1    | GCGTGCAATCCATCTTG TTC  |                     |
| 3   | Right junction | ZY010F      | ACGTAAGGGATGACGCACA    | 1380                |
| 4   |                | TC140R      | TACCACCGGTCCATTCCCTA   |                     |
| 5   | ANT1 control   | TC140F      | GGAAAATGGCATCTTGTTCCC  | 1056                |
| 6   |                | TC140R      | TACCACCGGTCCATTCCCTA   |                     |
| 7   | Replicon       | GR-F1       | TTGAGATGAGCACTTGGGATAG | 557                 |
| 8   |                | pCf.ANT1-R4 | ACCTCAACGACGCAAGTATT   |                     |

**Supplemental Table 3.** Primers for SpCas9-based HR event analyses

| <b>No.</b> | <b>Product</b> | <b>Primer name</b> | <b>Sequence (5'-3')</b> | <b>Product length (bp)</b> |
|------------|----------------|--------------------|-------------------------|----------------------------|
| 1          | Left junction  | UPANT1-F1          | TGCGATGATCTACGGTAACAAA  | 1485                       |
| 2          |                | NPTII-R1           | GCGTGCAATCCATCTTGTTTC   |                            |
| 3          | Right junction | ZY010F             | ACGTAAGGGATGACGCACA     | 1380                       |
| 4          |                | TC140R             | TACCACCGGTCCATTCCCTA    |                            |
| 5          | ANT1 control   | TC140F             | GGAAAATGGCATCTTGTTCCC   | 1056                       |
| 6          |                | TC140R             | TACCACCGGTCCATTCCCTA    |                            |
| 7          | Replicon       | GR-F1              | TTGAGATGAGCACTTGGGATAG  | 1198                       |
| 8          |                | 35S-R3             | CGTCAGTGGAGATGTCACATCA  |                            |

**Supplemental Table 4.** Phenotypic segregation of self-pollinated offspring of the LbCpf1-based HDR events

| No. | GE0 event | Total GE1 plants | Dark purple plant | hmHDR (%) <sup>*</sup> | Light purple plants | htHDR (%) <sup>**</sup> | WT-like | WT (%) |
|-----|-----------|------------------|-------------------|------------------------|---------------------|-------------------------|---------|--------|
| 1   | C1.4      | 113              | 30                | 26.5                   | 37                  | 32.7                    | 46      | 40.7   |
| 2   | C1.6      | 6                | 4                 | 66.7                   | 1                   | 16.7                    | 1       | 16.7   |
| 3   | C1.9      | 1                | 1                 | 100.0                  | 0                   | 0.0                     | 0       | 0.0    |
| 4   | C1.10     | 2                | 2                 | 100.0                  | 0                   | 0.0                     | 0       | 0.0    |
| 5   | C1.11     | 10               | 5                 | 50.0                   | 4                   | 40.0                    | 1       | 10.0   |
| 6   | C1.12     | 7                | 3                 | 42.9                   | 1                   | 14.3                    | 3       | 42.9   |
| 7   | C1.14     | 4                | 4                 | 100.0                  | 0                   | 0.0                     | 0       | 0.0    |
| 8   | C1.15     | 4                | 1                 | 25.0                   | 0                   | 0.0                     | 3       | 75.0   |
| 9   | C1.16     | 7                | 3                 | 42.9                   | 2                   | 28.6                    | 2       | 28.6   |
| Sum |           | 154              | 53                | 34.4                   | 45                  | 29.2                    | 56      | 36.4   |

<sup>\*</sup>Dark purple or homozygous-like HDR plants

<sup>\*\*</sup>Light purple or heterozygous-like HDR plants

**Supplemental Table 5.** Summary of SIHKT1;2 HDR experiment

| Total number of seeds ( at 70% germination rate) | Total cotyledon fragment | Total analyzed events | Total Potential HDR events | Total true HDR events | HDR efficiency |
|--------------------------------------------------|--------------------------|-----------------------|----------------------------|-----------------------|----------------|
| 460                                              | 640*                     | 150                   | 09                         | 01                    | 0.66%**        |

\*Can be done in only one transformation.

\*\*HKT1;2 gene donor template contains neither antibiotic selection marker nor ANT1 color marker.
